# Supplementary material for: Tandem transfer hydrogenation–epoxidation of ketone substrates catalysed by alkene-tethered Ru(ii)–NHC complexes
Source: Royal Society of Chemistry journal article supplement (doi:10.1039/c9nj01220f), 2019-01-01
Supplement: c9nj01220f1.pdf [file c9nj01220f1.pdf]

## Tandem transfer hydrogenation-epoxidation of ketone substrates catalysed by alkene-tethered Ru(II)-NHC complexes

Frederick P. Malan,<sup>[a]</sup> Eric Singleton,<sup>[a]</sup> Petrus H. van Rooyen<sup>[a]</sup> and Marilé Landman<sup>\*[a]</sup>

[a] Department of Chemistry, University of Pretoria, 02 Lynnwood Road, Hatfield, Pretoria, 0002, South Africa.

### Supporting Information

1. Synthesis, characterization, and NMR spectra of [H(L1-L6)]Cl
2. <sup>1</sup>H-, <sup>13</sup>C-, <sup>31</sup>P-NMR spectra of **1-9**
3. Variable temperature <sup>1</sup>H-NMR spectra (complex **4**)
4. Crystal data and structure refinement for [HL5]Cl, **P2**, **P3**, **1**, **2**, **4**, **5**, **8**, **9** (Tables **S1**, **S2**, **S3**)
5. Selected bond lengths and angles for [HL5]Cl, **P2**, **P3**, **1**, **2**, **4**, **5**, **8**, **9** (Table **S4**)
6. Time-resolved conversion profiles in the transfer hydrogenation-epoxidation catalysis
7. Optimization of transfer hydrogenation-epoxidation conditions (Table **S5**)
8. <sup>1</sup>H-NMR spectrum of catalysis reaction mixture

1. Synthesis, characterization, and NMR spectra of [H(L1-L6)]Cl

General synthesis of imidazolium salts: To an acetonitrile (20 mL) solution of the respective *N*-alkyl imidazole (42 mmol, [HL1]Cl, [HL2]Cl) was added 1-chloro-2-methylpropene (1 equivalent), and the resulting mixture heated under reflux overnight. After cooling, the reaction mixture was concentrated *in vacuo*, and washed with a 1:1 v/v Et<sub>2</sub>O/Et<sub>2</sub>OAc mixture (3 × 15 mL). The resulting oil/solid was concentrated *in vacuo* to give the respective ligands [H(L1-L6)]Cl.

[HL1]Cl: Yield: 94%. <sup>1</sup>H NMR ((CD<sub>3</sub>)<sub>2</sub>SO): δ<sub>H</sub> = 1.67 (s, 3H, CH<sub>3</sub>), 3.89 (s, 3H, NCH<sub>3</sub>), 4.84 (s, 3H, =CH + NCH<sub>2</sub>), 5.01 (s, 1H, =CH), 7.74 (d, <sup>3</sup>J<sub>HH</sub> = 2 Hz, 1H, NCH), 7.81 (d, <sup>3</sup>J<sub>HH</sub> = 2 Hz, 1H, NCH), 9.40 (s, 1H, NCHN). <sup>13</sup>C{<sup>1</sup>H} NMR ((CD<sub>3</sub>)<sub>2</sub>SO): δ<sub>C</sub> = 19.5 (s, CH<sub>3</sub>), 35.9 (s, NCH<sub>3</sub>), 54.0 (s, NCH<sub>2</sub>), 114.9 (s, =CH<sub>2</sub>), 122.6 (s, NCH), 123.9 (s, NCH), 137.0 (s, CCH<sub>2</sub>), 139.5 (s, NCN).

<sup>1</sup>H-NMR

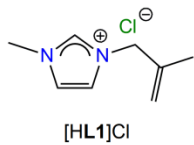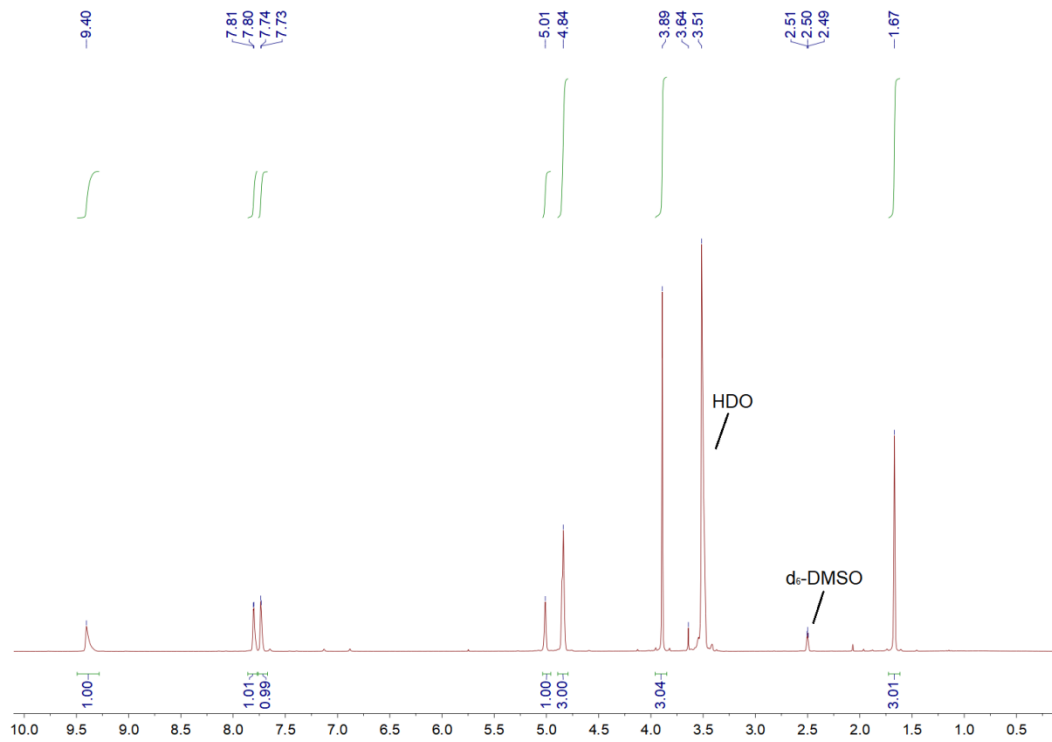

<sup>13</sup>C-NMR

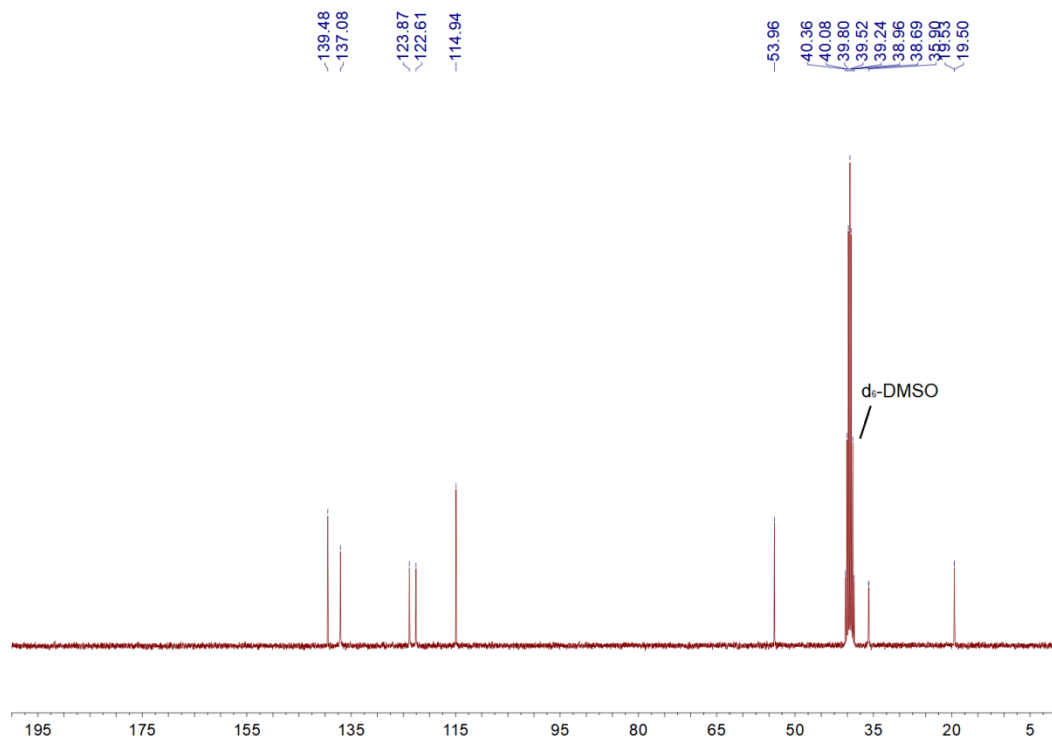

[HL2]Cl: Yield: 91%.  $^1\text{H}$  NMR ( $\text{CDCl}_3$ ):  $\delta_{\text{H}} = 1.39$  (s, 3H,  $\text{CH}_3$ ), 4.65 (s, 1H,  $=\text{CH}_2$ ), 4.72 (s, 1H,  $=\text{CH}_2$ ), 4.83 (s, 2H,  $\text{CH}_2$ ), 5.34 (s, 2H,  $\text{CH}_2$ ), 6.66 (s, 1H, NCH), 6.70 (s, 1H, NCH), 7.26 (m, 4H,  $\text{C}_6\text{H}_5$ ), 7.49 (m, 1H,  $\text{C}_6\text{H}_5$ ), 10.14 (s, 1H, NCHN).  $^{13}\text{C}\{^1\text{H}\}$  NMR ( $\text{CDCl}_3$ ):  $\delta_{\text{C}} = 18.5$  (s,  $\text{CH}_3$ ), 51.6 (s,  $\text{CH}_2$ ), 53.9 (s,  $\text{CH}_2$ ), 115.5 (s,  $=\text{CH}_2$ ), 121.4 (s, NCH), 121.4 (s, NCH), 132.6 (s,  $\text{C}_6\text{H}_5$ ), 135.1 (s,  $\text{C}_6\text{H}_5$ ), 135.7 (s, *ipso*  $\text{C}_6\text{H}_5$ ), 136.0 (s,  $\text{CCH}_2$ ), 136.9 (s, NCHN).

$^1\text{H}$ -NMR

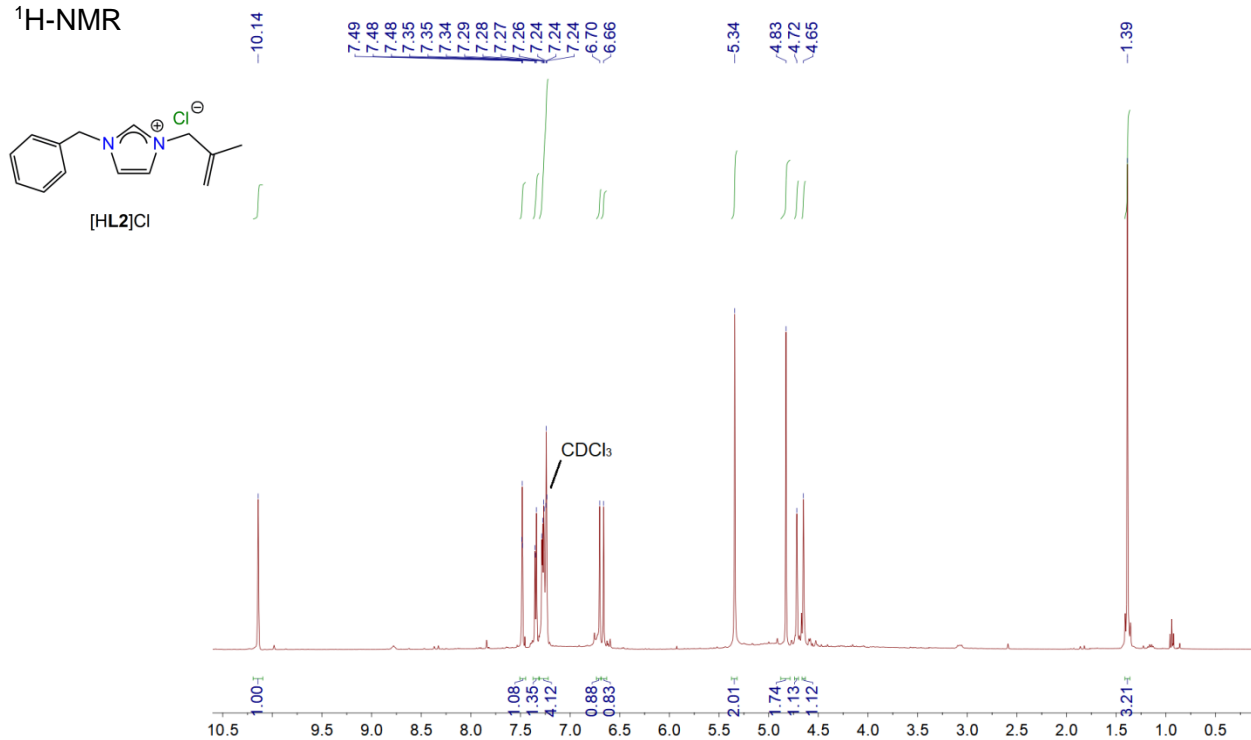

$^{13}\text{C}$ -NMR

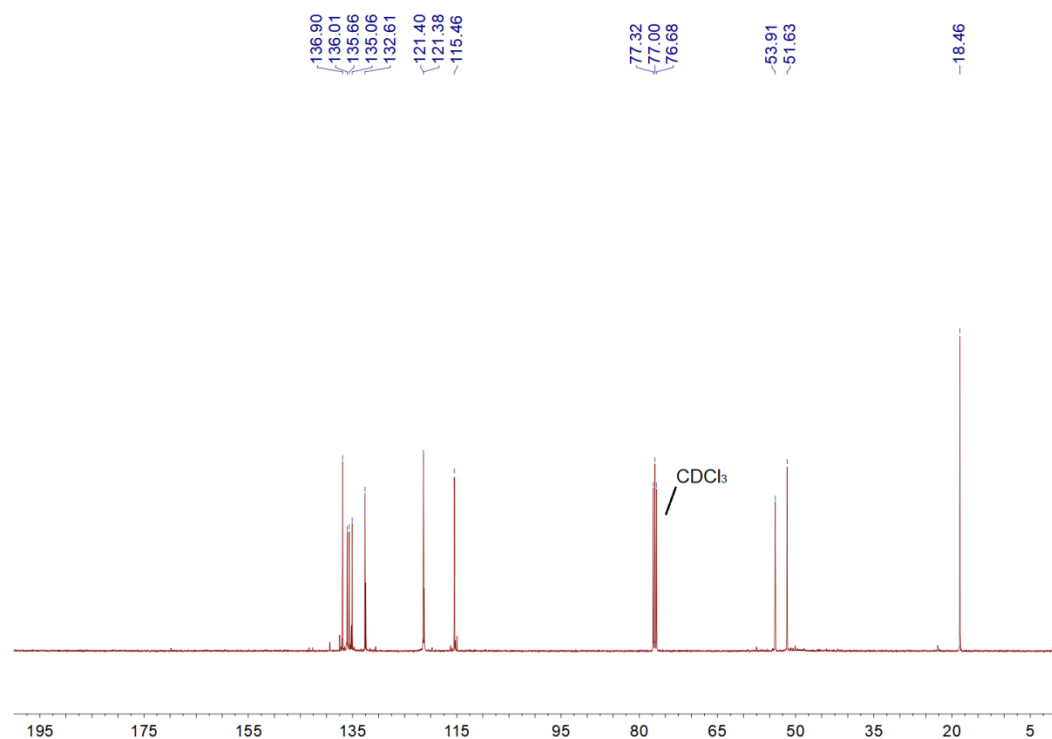

[HL3]Cl: Yield: 67%.  $^1\text{H}$  NMR ( $\text{CDCl}_3$ ):  $\delta_{\text{H}} = 1.67$  (s, 3H,  $\text{CH}_3$ ), 4.79 (s, 2H,  $\text{CH}_2$ ), 4.92 (s, 1H,  $=\text{CH}$ ), 5.07 (s, 1H,  $=\text{CH}$ ), 5.84 (s, 2H,  $\text{CH}_2$ ), 6.74 (s, 1H, NCH), 6.94 (s, 1H, NCH), 7.74 (d,  $^3J_{\text{HH}} = 6$  Hz, 2H,  $\text{C}_6\text{H}_4$ ), 8.05 (m, 2H,  $\text{C}_6\text{H}_4$ ), 10.82 (s, 1H, NCHN).  $^{13}\text{C}\{^1\text{H}\}$  NMR ( $\text{CDCl}_3$ ):  $\delta_{\text{C}} = 19.5$  (s,  $\text{CH}_3$ ), 51.9 (s,  $\text{CH}_2$ ), 53.6 (s,  $\text{CH}_2$ ), 117.4 (s,  $=\text{CH}_2$ ), 122.0 (s, NCH), 122.3 (s, NCH), 129.1 (s,  $\text{C}_6\text{H}_4$ ), 129.5 (s,  $\text{C}_6\text{H}_4$ ), 129.9 (s, *ipso*  $\text{C}_6\text{H}_4$ ), 137.4 (s,  $\text{CCH}_2$ ), 143.4 (s, NCN).

$^1\text{H}$ -NMR

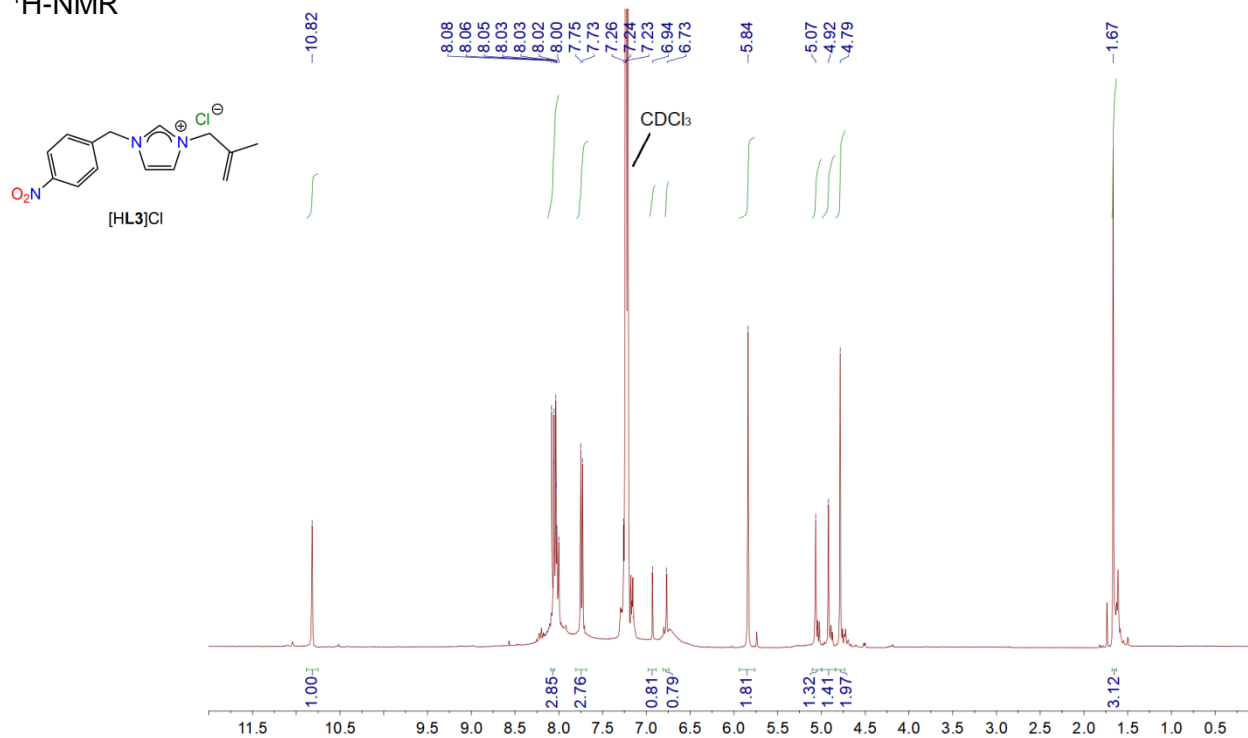

$^{13}\text{C}$ -NMR

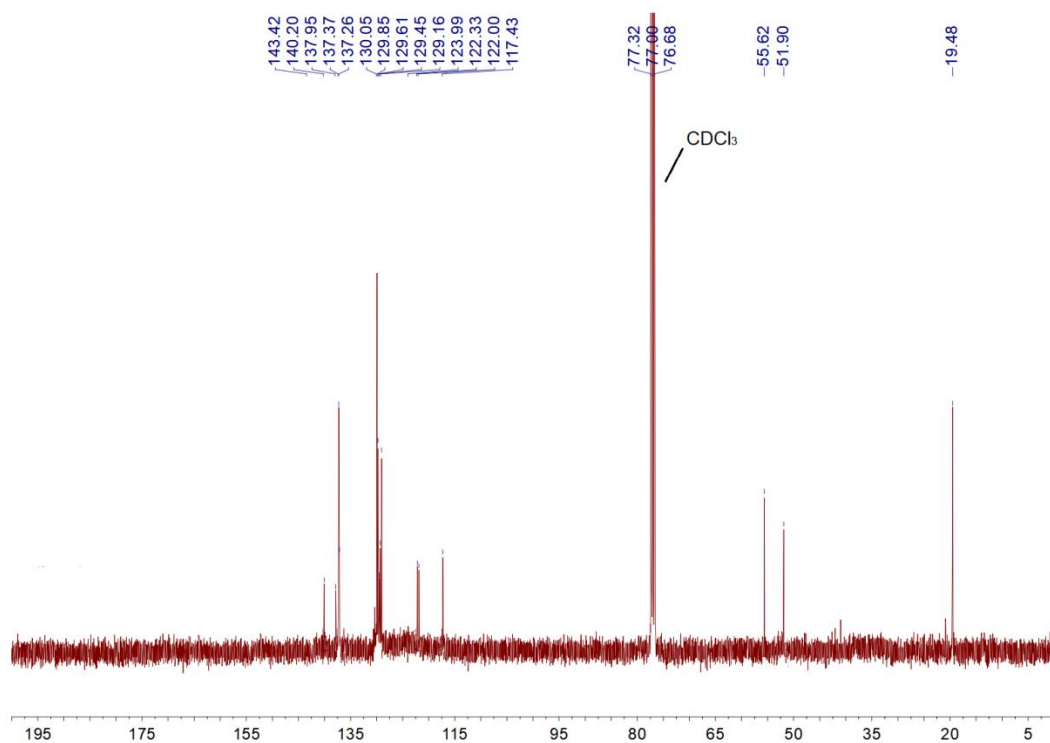

[HL4]Cl: Yield: 86%.  $^1\text{H NMR}$  ( $\text{CDCl}_3$ ):  $\delta_{\text{H}} = 1.63$  (s, 3H,  $\text{CH}_3$ ), 1.97 (t,  $^3J_{\text{HH}} = 8$  Hz, 2H,  $\text{CH}_2$ ), 4.69 (t,  $^3J_{\text{HH}} = 8$  Hz, 2H,  $\text{CH}_2$ ), 4.84 (m, 4H,  $=\text{CH}_2 + \text{CH}_2$ ), 5.02 (s, 1H,  $=\text{CH}_2$ ), 7.09 (d,  $^3J_{\text{HH}} = 8$  Hz, 1H, NCH), 7.18-7.28 (m, 3H, NCH +  $\text{C}_6\text{H}_5$ ), 7.37 (m, 1H,  $\text{C}_6\text{H}_5$ ), 7.40 (m, 1H,  $\text{C}_6\text{H}_5$ ), 7.70 (m, 1H,  $\text{C}_6\text{H}_5$ ), 10.06 (s, 1H, NCHN).  $^{13}\text{C}\{^1\text{H}\}$  NMR ( $\text{CDCl}_3$ ):  $\delta_{\text{C}} = 19.1$  (s,  $\text{CH}_3$ ), 35.8 (s,  $\text{CH}_2$ ), 50.4 (s,  $\text{CH}_2$ ), 54.8 (s,  $\text{CH}_2$ ), 116.4 (s,  $=\text{CH}_2$ ), 121.5 (s, NCH), 122.5 (s, NCH), 126.5 (s,  $\text{C}_6\text{H}_5$ ), 128.3 (s,  $\text{C}_6\text{H}_5$ ), 128.4 (s,  $\text{C}_6\text{H}_5$ ), 135.3 (s, *ipso*  $\text{C}_6\text{H}_5$ ), 136.4 (s,  $\text{CCH}_2$ ), 137.4 (s, NCHN).

$^1\text{H-NMR}$

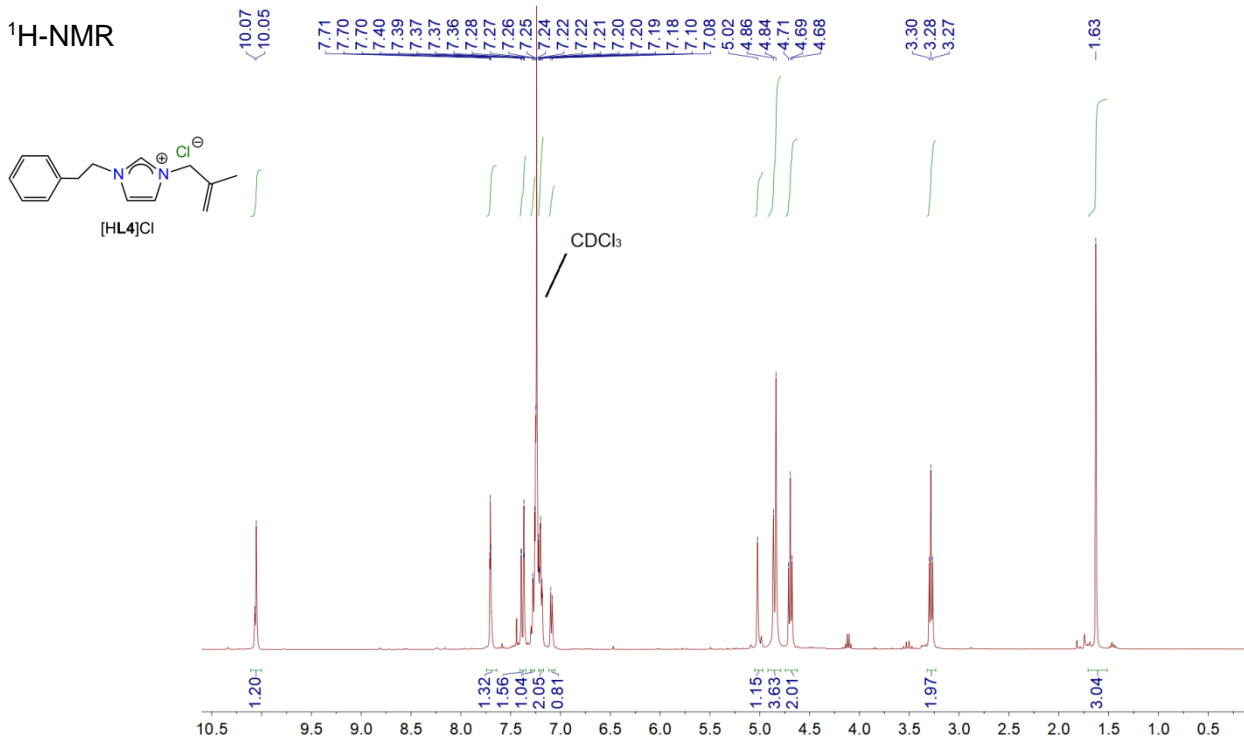

$^{13}\text{C-NMR}$

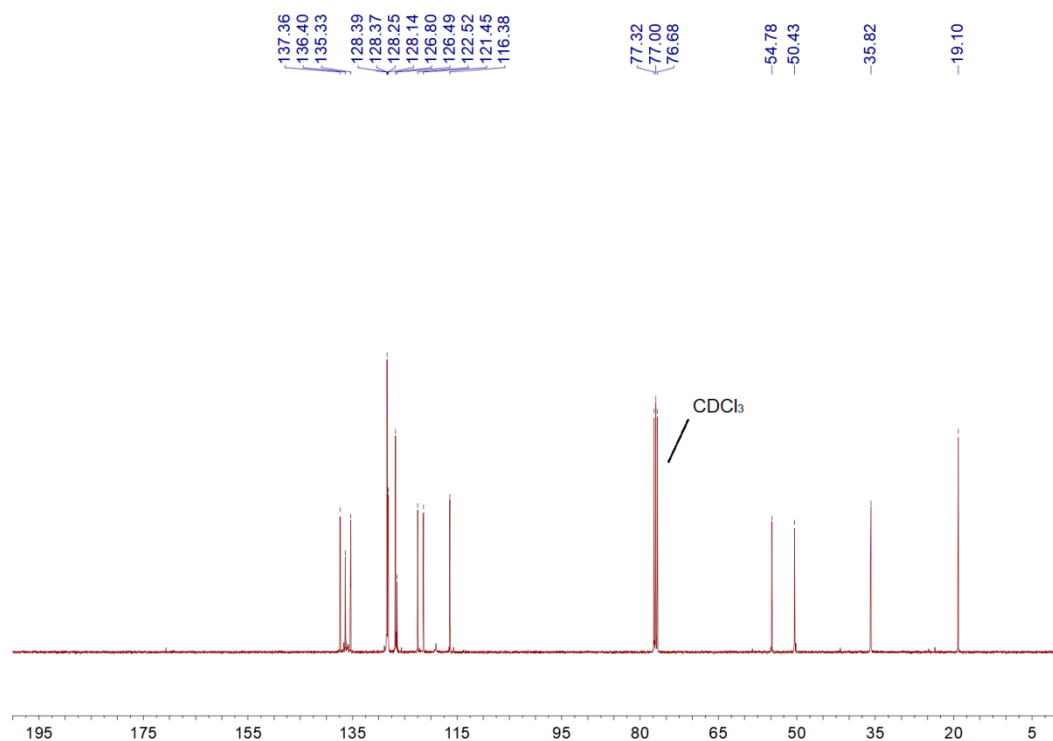

[HL5]Cl: Yield: 88%.  $^1\text{H}$  NMR ( $\text{CDCl}_3$ ):  $\delta_{\text{H}} = 1.67$  (s, 6H,  $\text{CH}_3$ ), 4.91 (s, 6H,  $\text{CH}_2 + =\text{CH}_2$ ), 5.03 (s, 2H,  $=\text{CH}_2$ ), 7.38 (s, 2H, NCH), 10.62 (s, 1H, NCH).  $^{13}\text{C}\{^1\text{H}\}$  NMR ( $\text{CDCl}_3$ ):  $\delta_{\text{C}} = 19.5$  (s,  $\text{CH}_3$ ), 19.6 (s,  $\text{CH}_3$ ), 55.4 (s,  $\text{CH}_2$ ), 116.9 (s,  $=\text{CH}_2$ ), 122.0 (s, NCH), 137.9 (s,  $\text{C}(\text{CH}_3)_2$ ), 138.3 (s, NCH).

$^1\text{H}$ -NMR

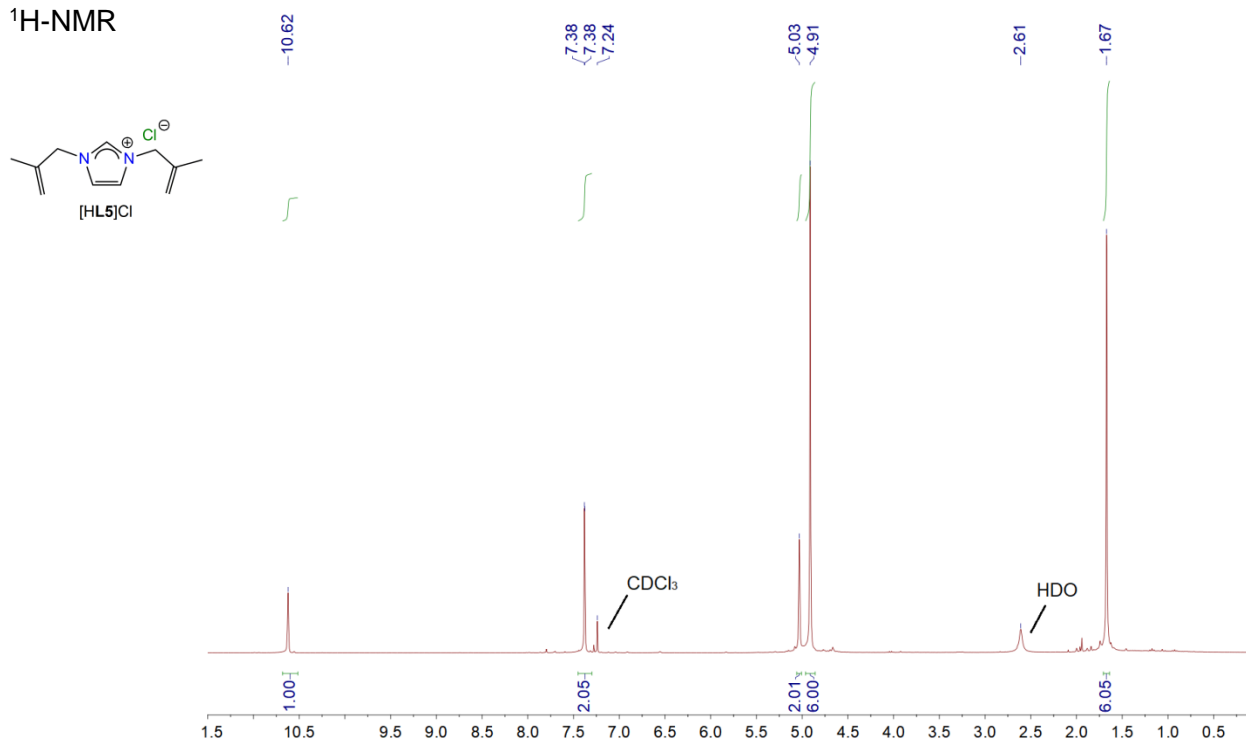

$^{13}\text{C}$ -NMR

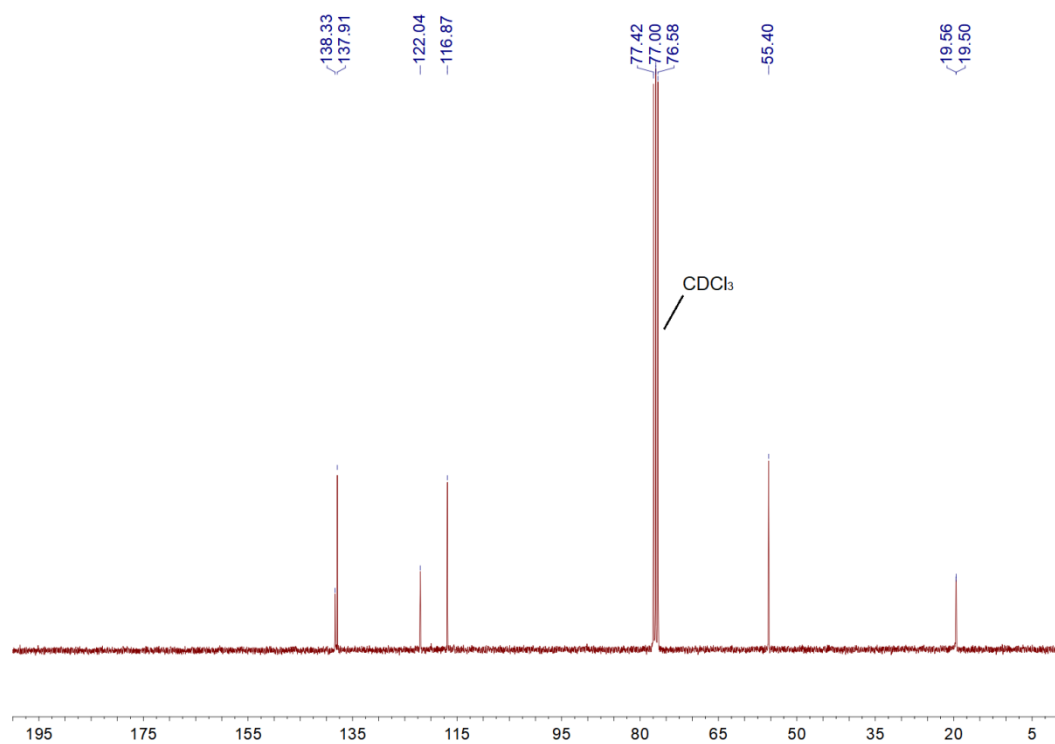

[HL6]Cl: Yield: 92%.  $^1\text{H NMR}$  ( $(\text{CD}_3)_2\text{SO}$ ):  $\delta_{\text{H}} = 1.73$  (s, 3H,  $\text{CH}_3$ ), 4.94 (s, 1H,  $=\text{CH}_2$ ), 5.06 (s, 1H,  $=\text{CH}_2$ ), 5.22 (s, 2H,  $\text{NCH}_2$ ), 5.87 (s, 2H,  $\text{NCH}_2$ ), 7.30-7.42 (m, 3H,  $\text{C}_6\text{H}_4$ ), 7.54-7.66 (m, 4H,  $\text{C}_6\text{H}_4 + \text{C}_6\text{H}_5$ ), 8.00 (m, 2H,  $\text{C}_6\text{H}_5$ ), 10.34 (s, 1H,  $\text{NCHN}$ ).  $^{13}\text{C}\{^1\text{H}\}$  NMR ( $(\text{CD}_3)_2\text{SO}$ ):  $\delta_{\text{C}} = 19.8$  (s,  $\text{CH}_3$ ), 47.8 (s,  $\text{CH}_2$ ), 51.5 (s,  $\text{CH}_2$ ), 110.8 (s,  $\text{C}_6\text{H}_4$ ), 119.6 (s,  $=\text{CH}_2$ ), 121.8 (s,  $\text{NCH}$ ), 122.6 (s,  $\text{NCH}$ ), 127.5 (s,  $\text{C}_6\text{H}_5$ ), 127.8 (s,  $\text{C}_6\text{H}_5$ ), 128.8 (s,  $\text{C}_6\text{H}_5$ ), 133.7 (s,  $\text{C}_6\text{H}_4$ ), 137.0 (s, *ipso*  $\text{C}_6\text{H}_5$ ), 143.6 (s,  $\text{CCH}_2$ ), 144.3 (s,  $\text{NCN}$ ).

$^1\text{H-NMR}$

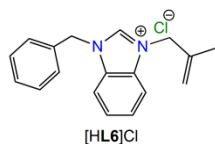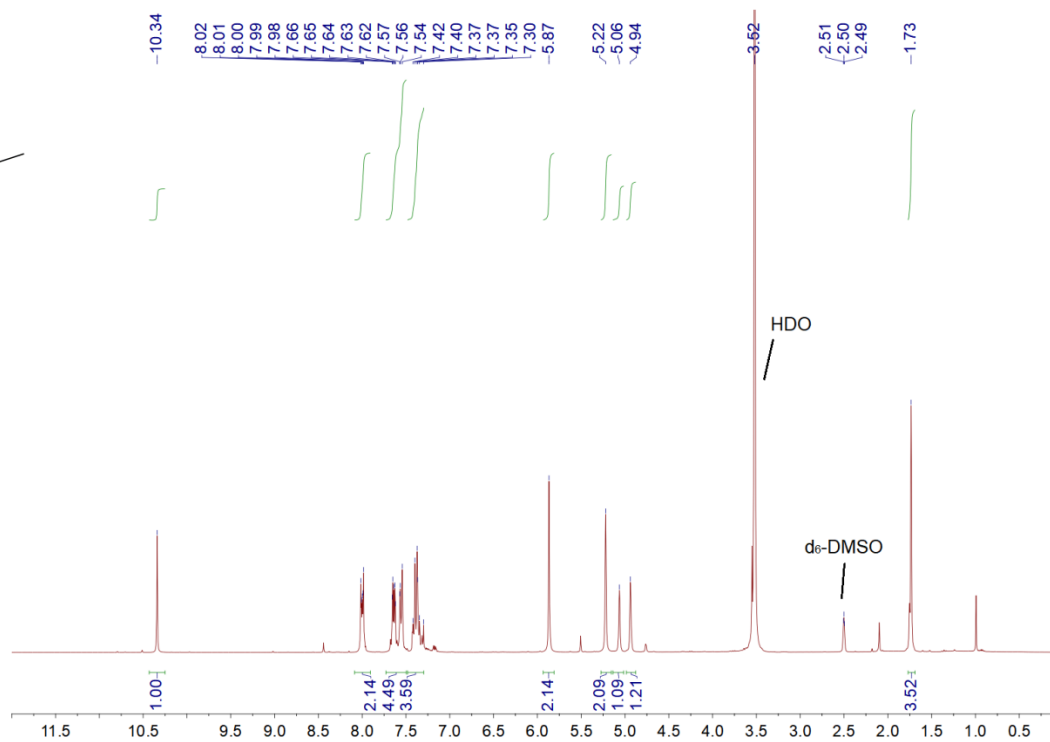

$^{13}\text{C-NMR}$

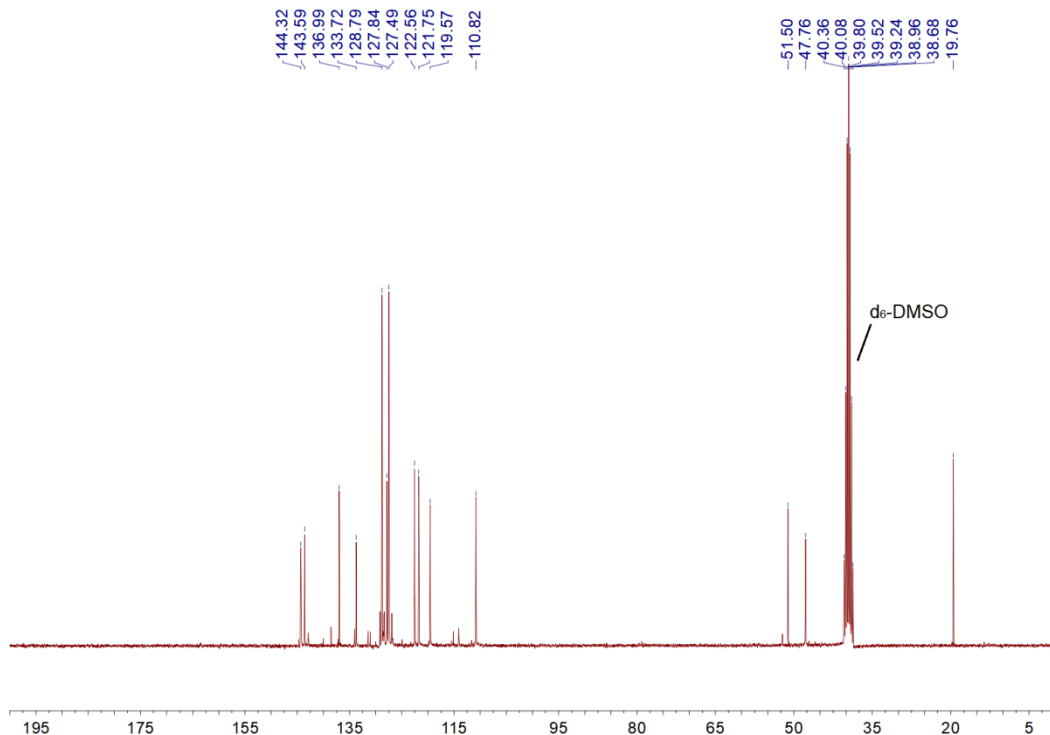

## 2. $^1\text{H}$ -, $^{13}\text{C}$ -, $^{31}\text{P}$ -NMR spectra of **1-9**

### Complex 1

#### $^1\text{H}$ -NMR

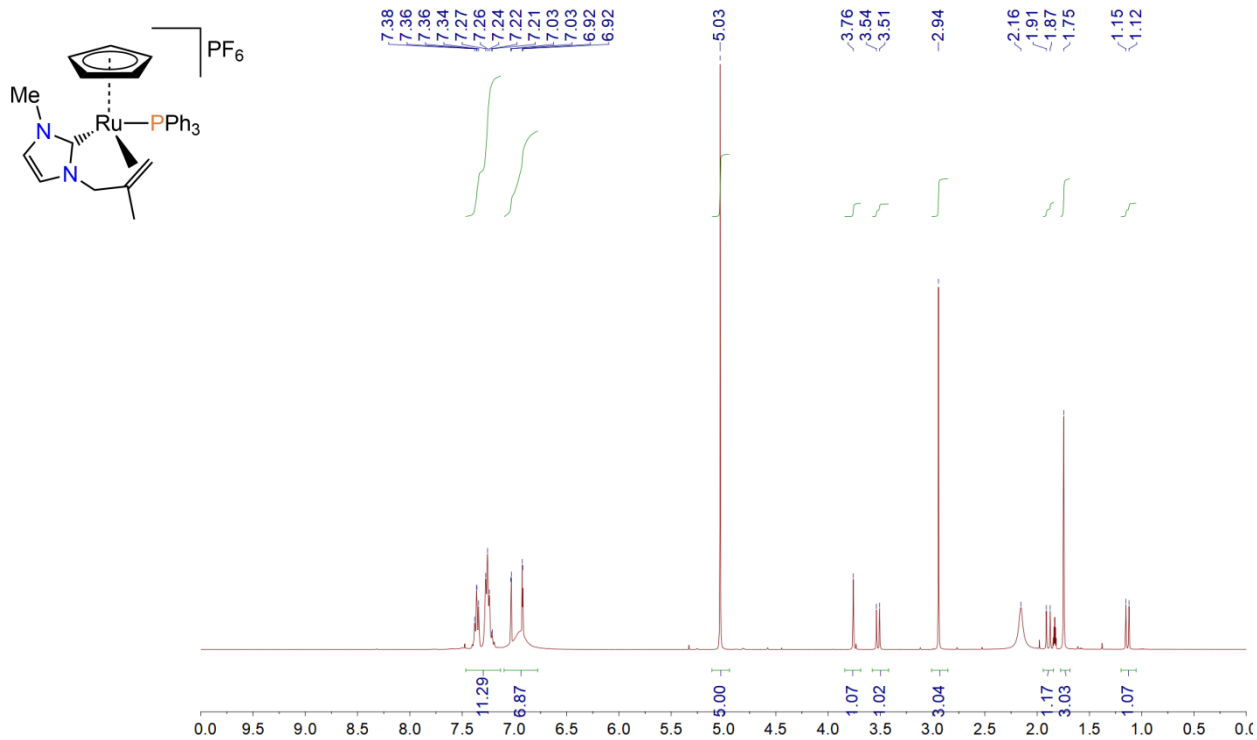

#### $^{13}\text{C}$ -NMR

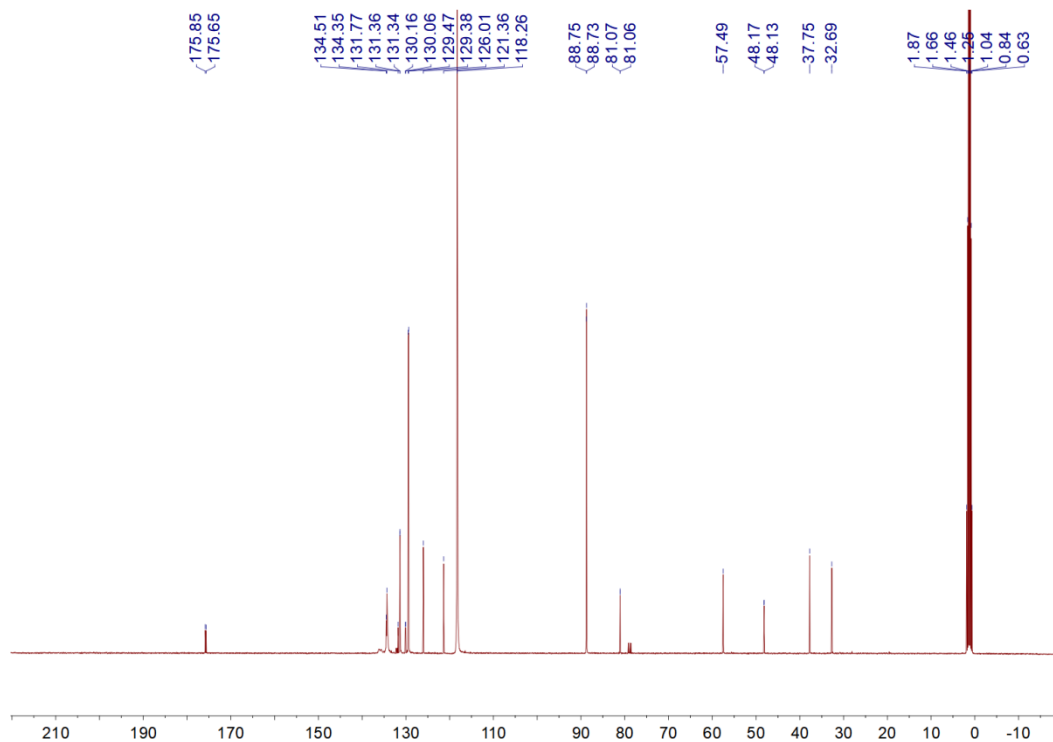



### $^{31}\text{P}$ -NMR

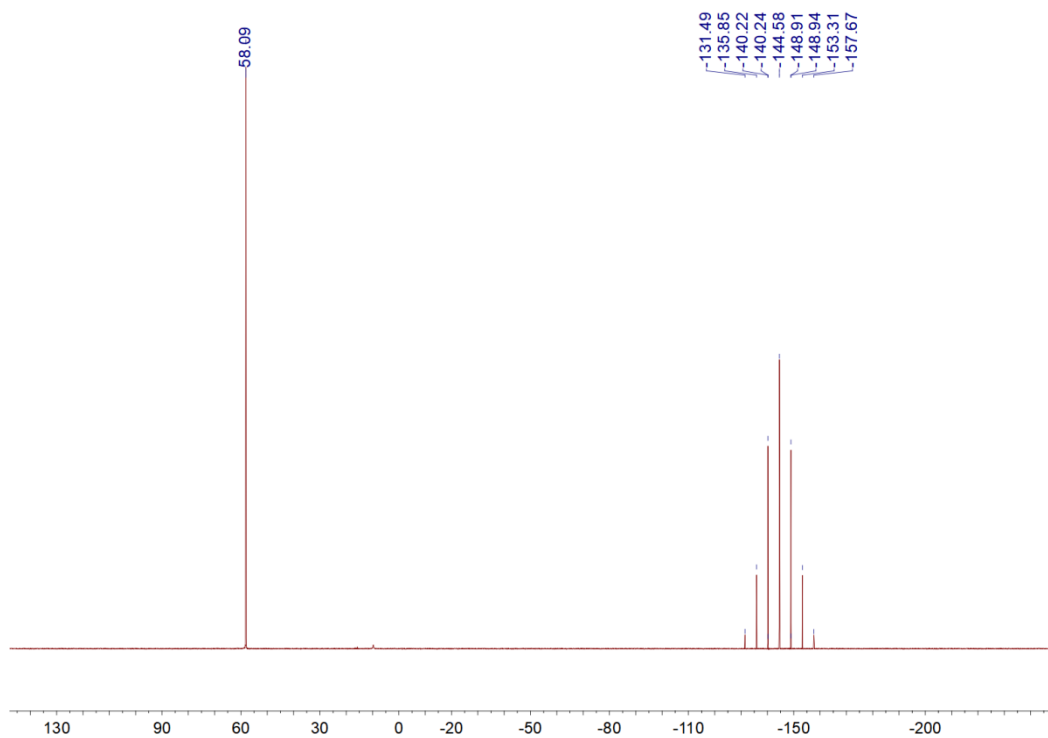

### Complex 2

#### $^1\text{H}$ -NMR

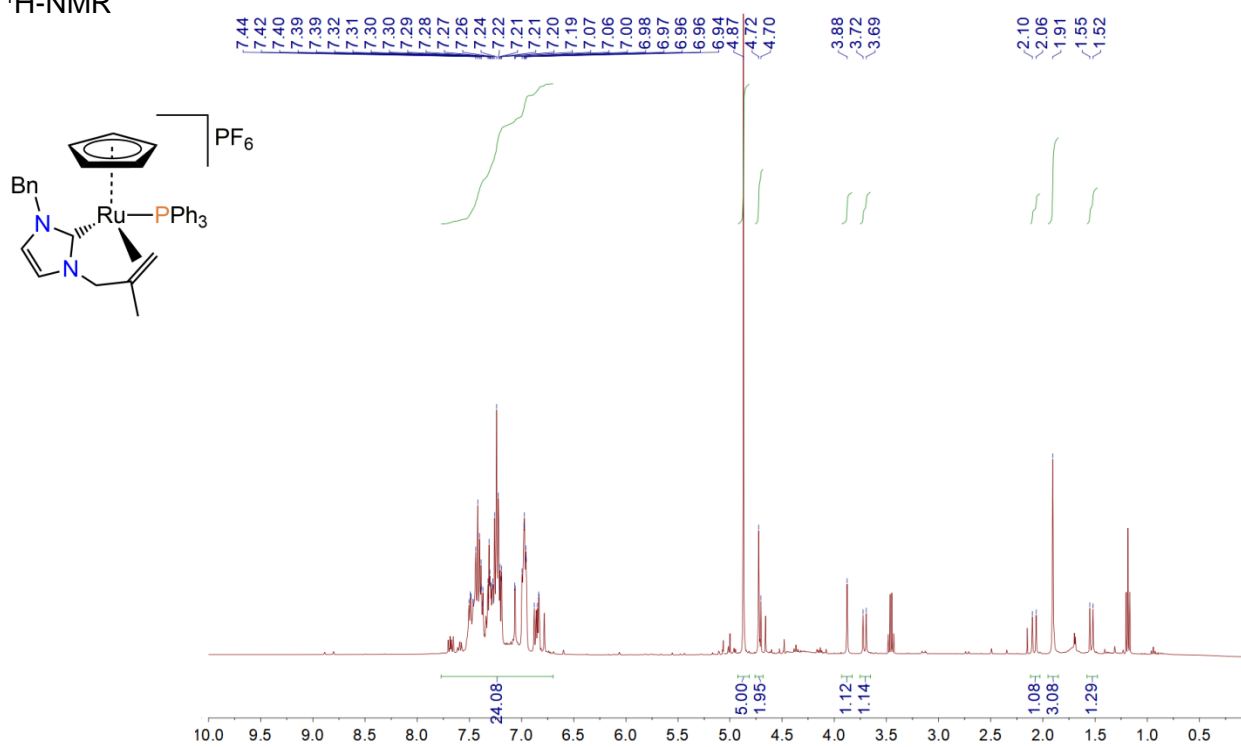

<sup>13</sup>C-NMR

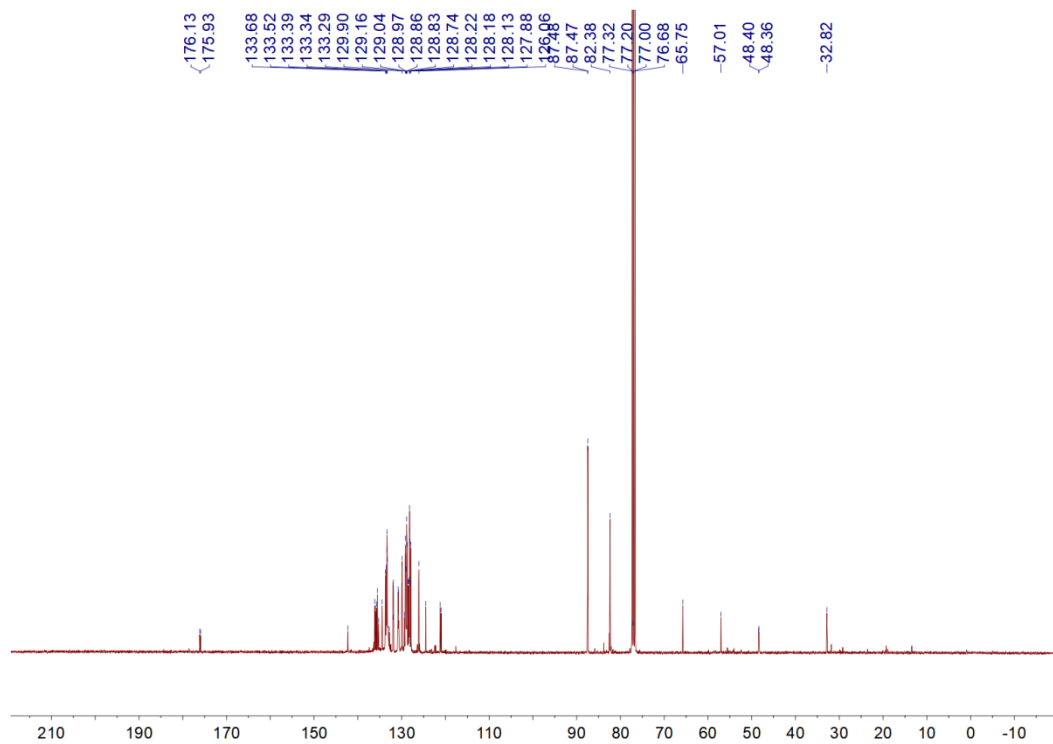

<sup>31</sup>P-NMR

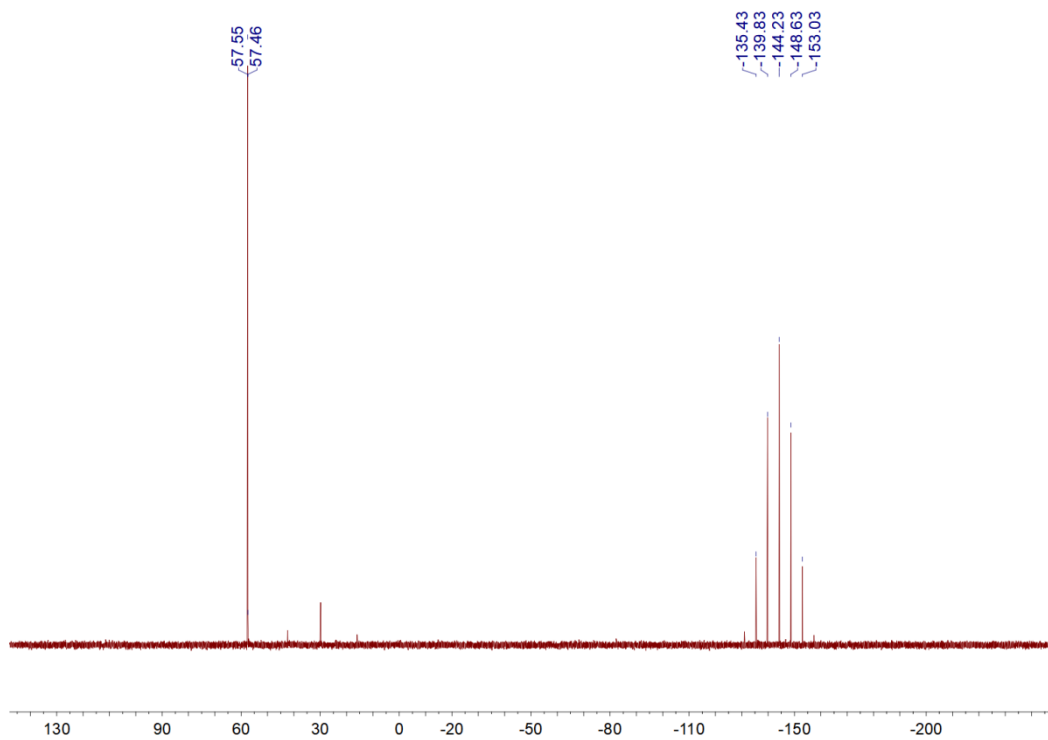

### Complex 3

<sup>1</sup>H-NMR

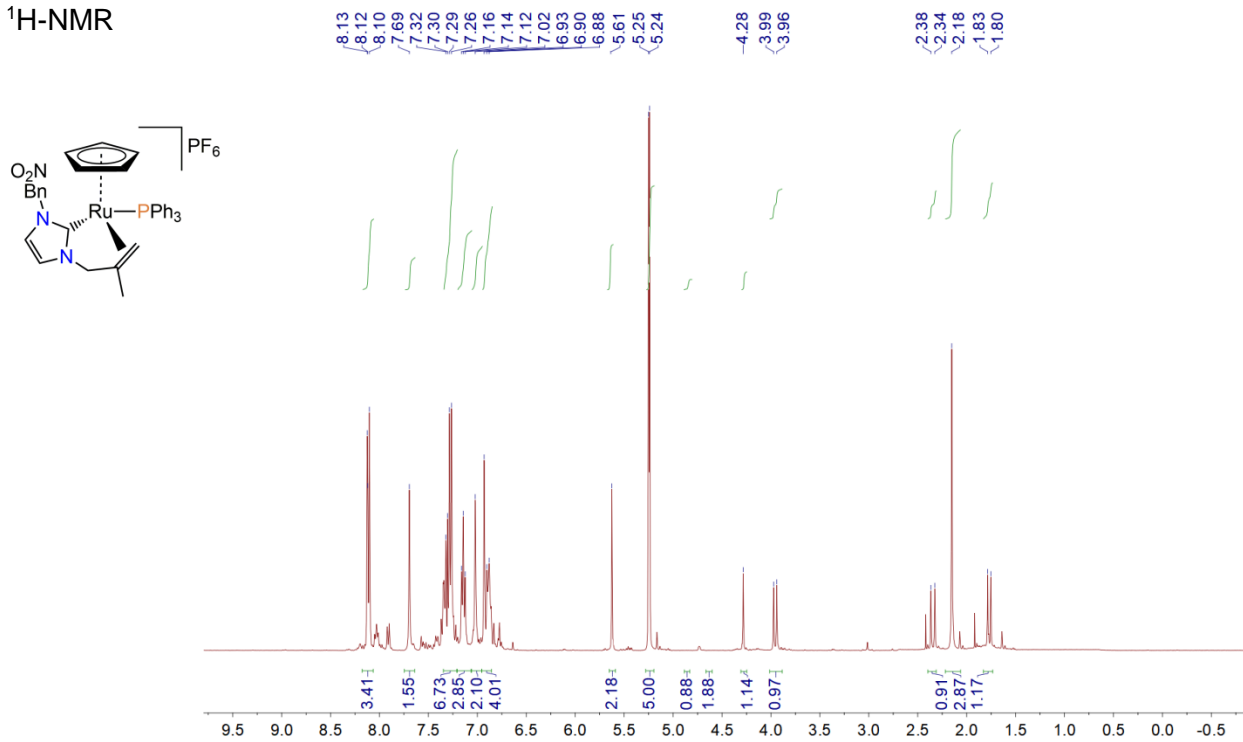

<sup>13</sup>C-NMR

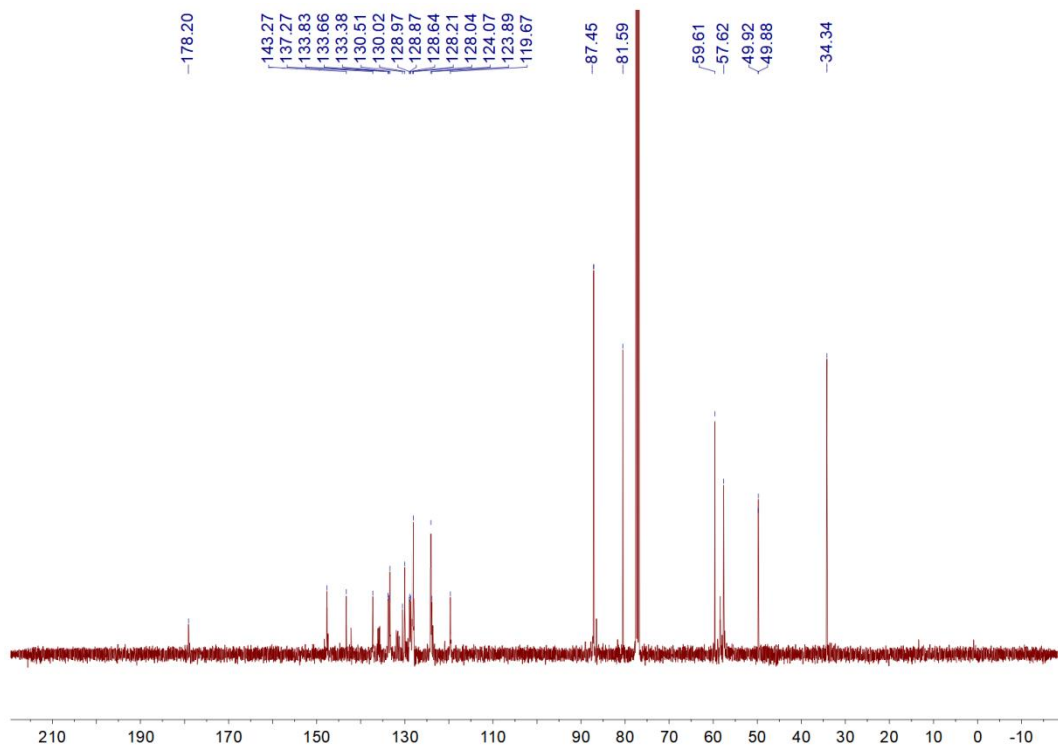

### <sup>31</sup>P-NMR

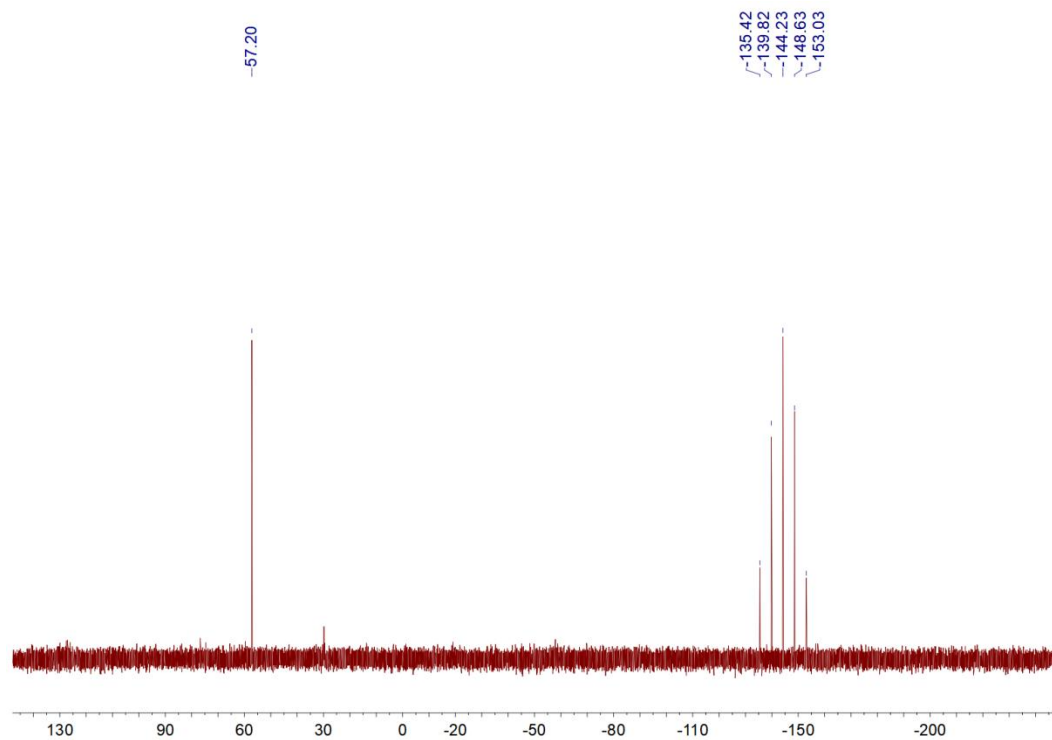

### Complex 4

#### <sup>1</sup>H-NMR

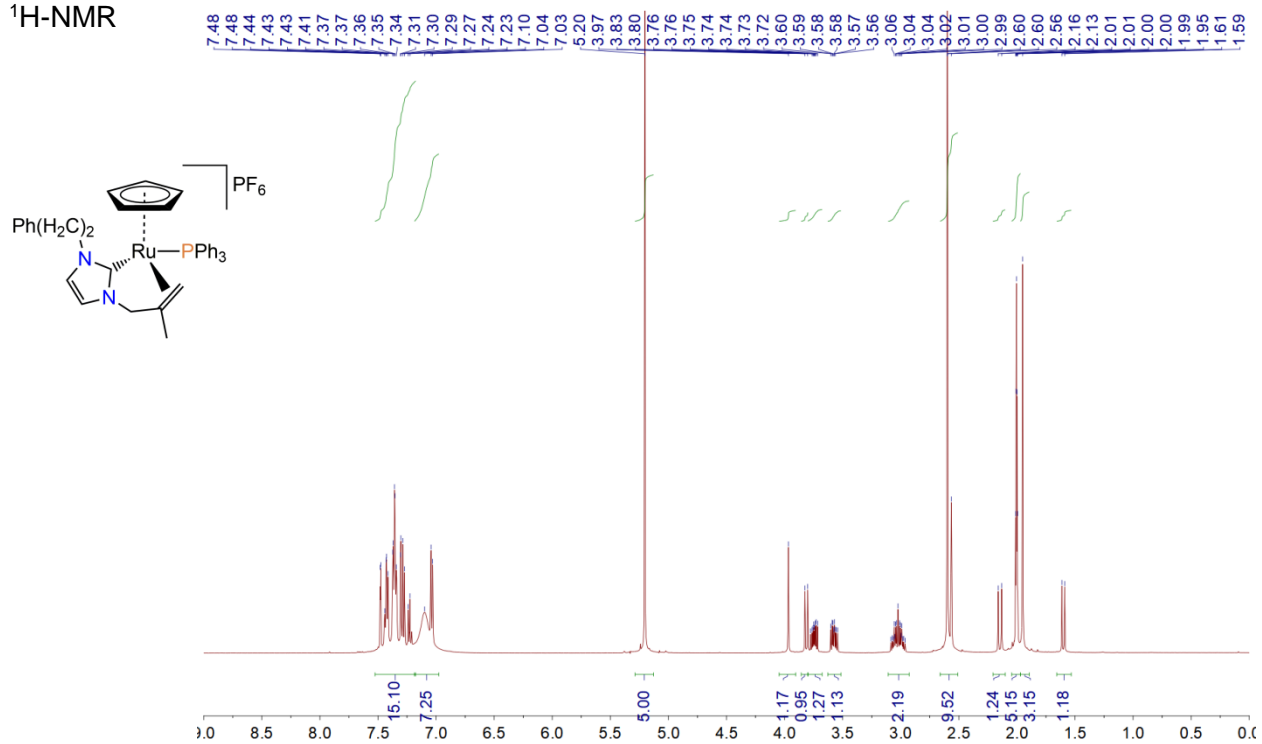

$^{13}\text{C}$ -NMR

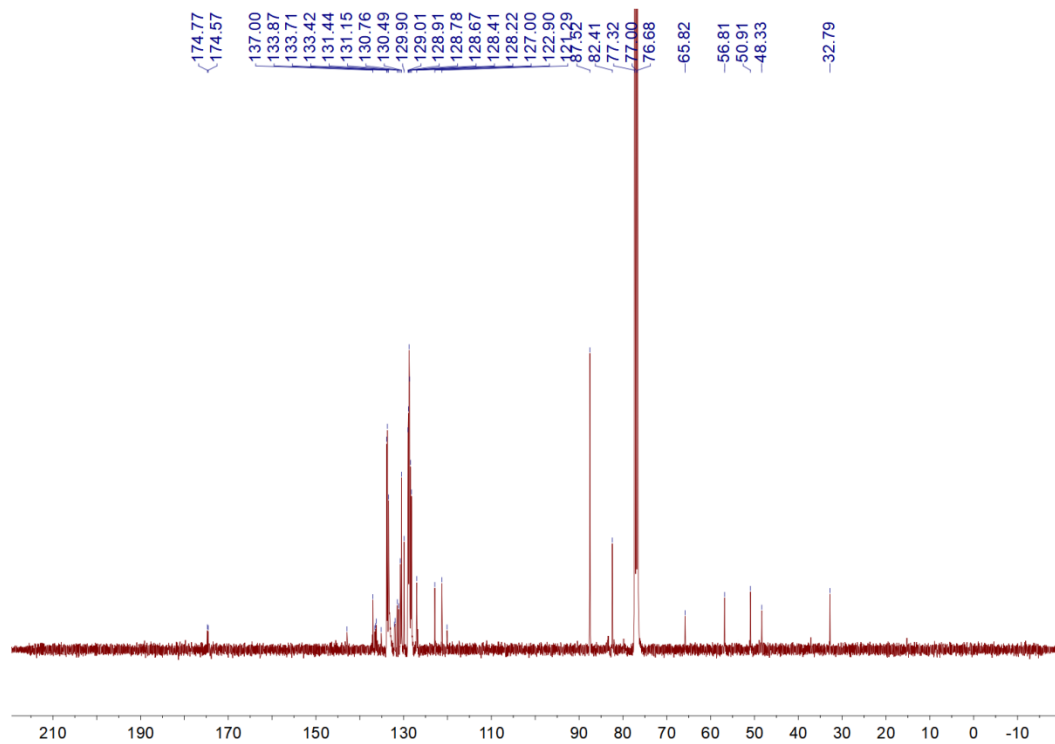

$^{31}\text{P}$ -NMR

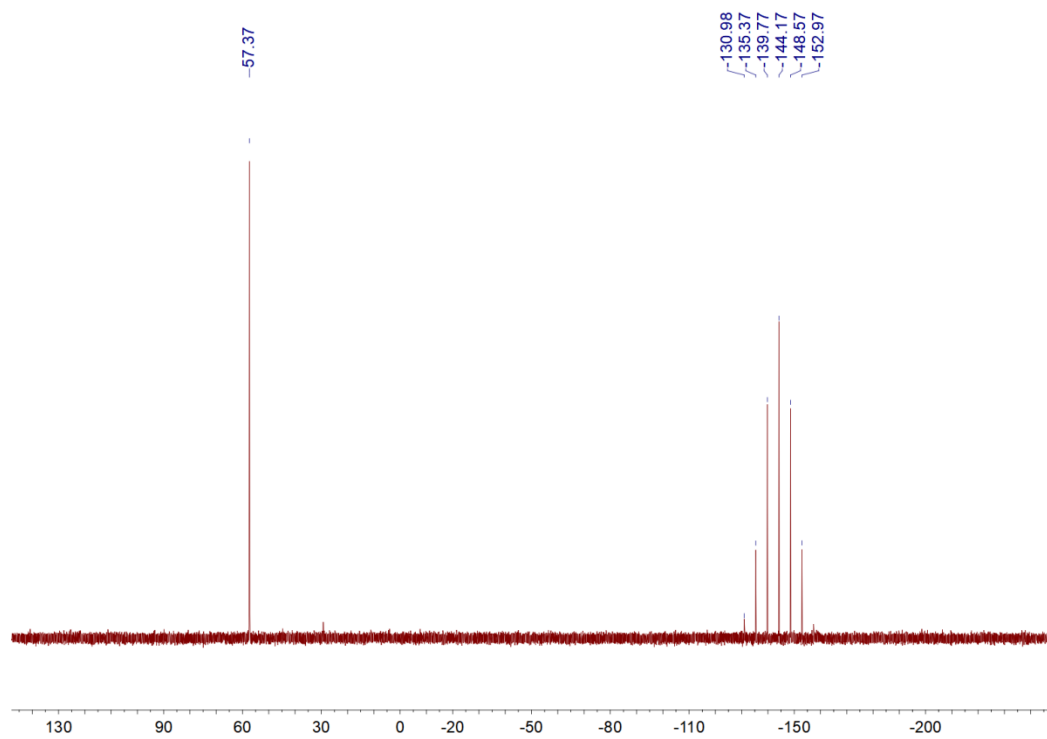

## Complex 5

<sup>1</sup>H-NMR

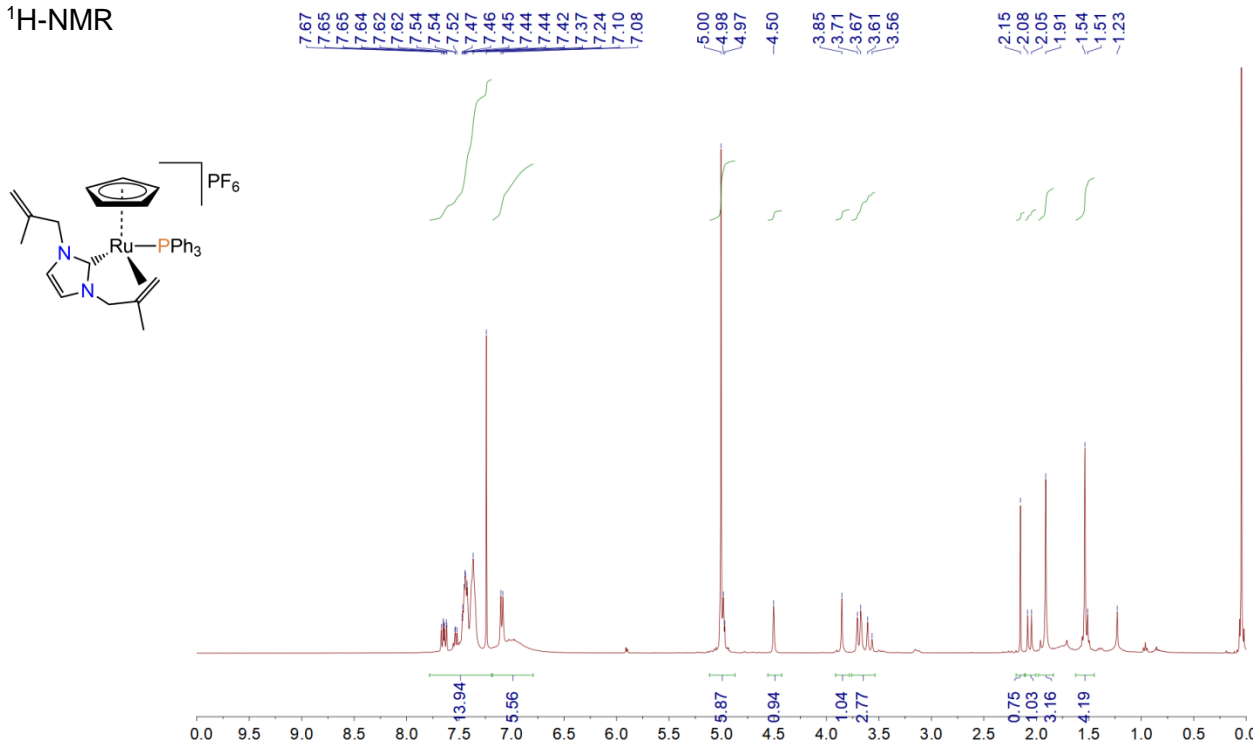

<sup>13</sup>C-NMR

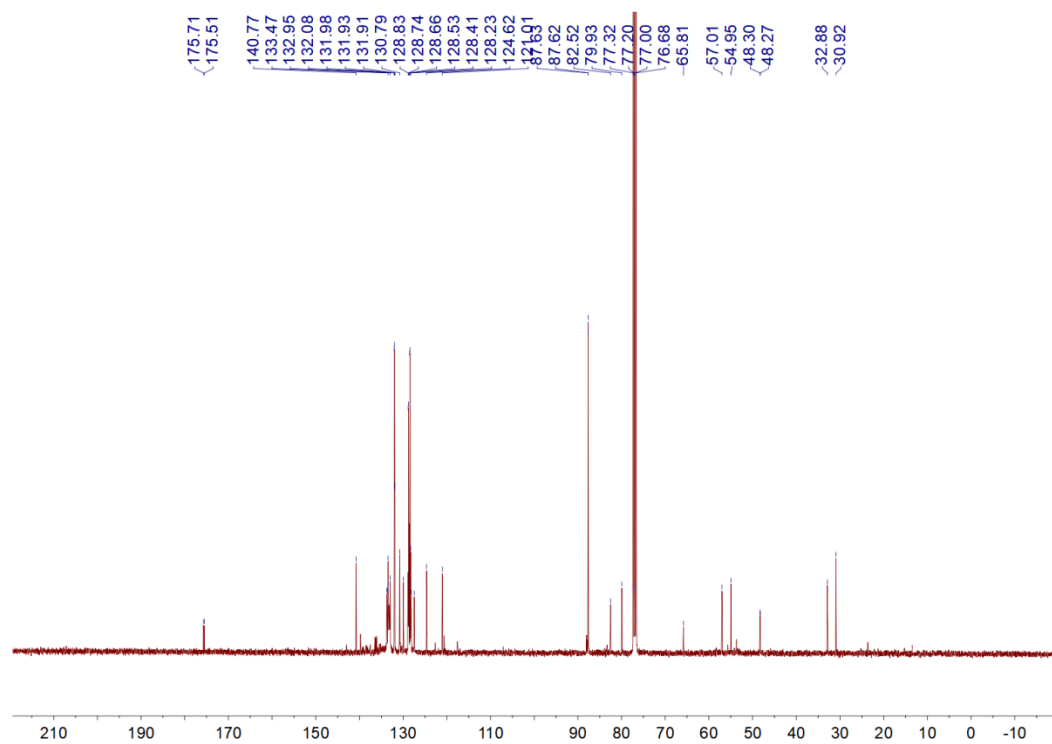

### <sup>31</sup>P-NMR

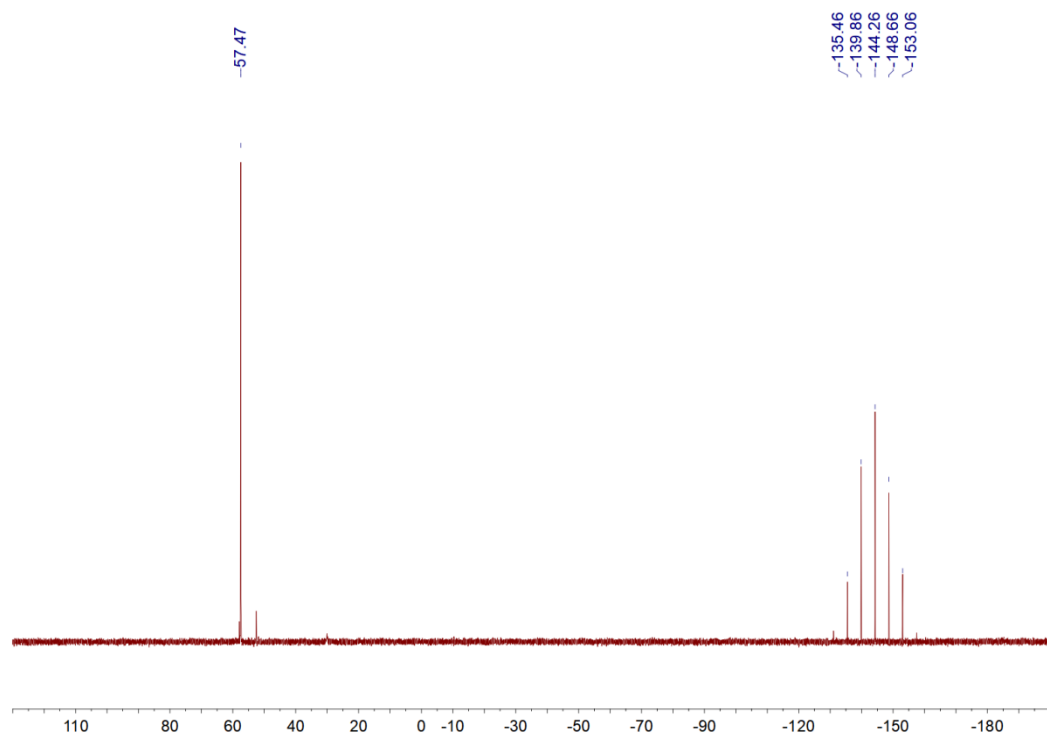

### Complex 6

#### <sup>1</sup>H-NMR

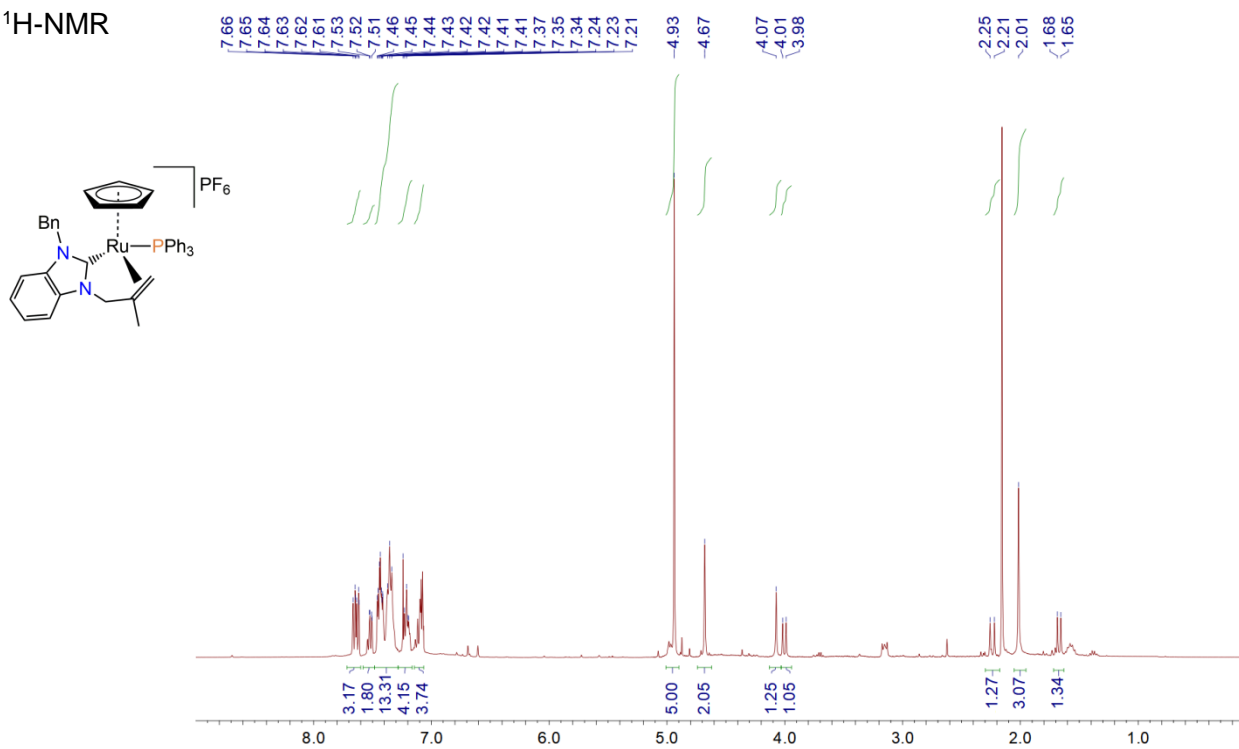

<sup>13</sup>C-NMR

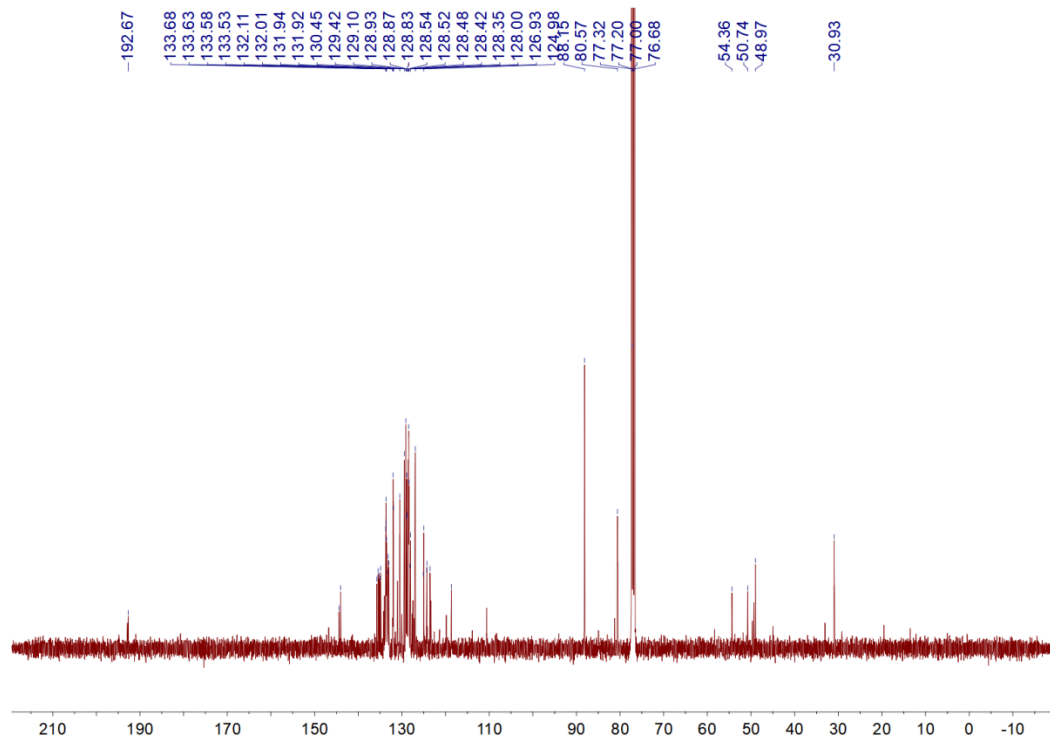

<sup>31</sup>P-NMR

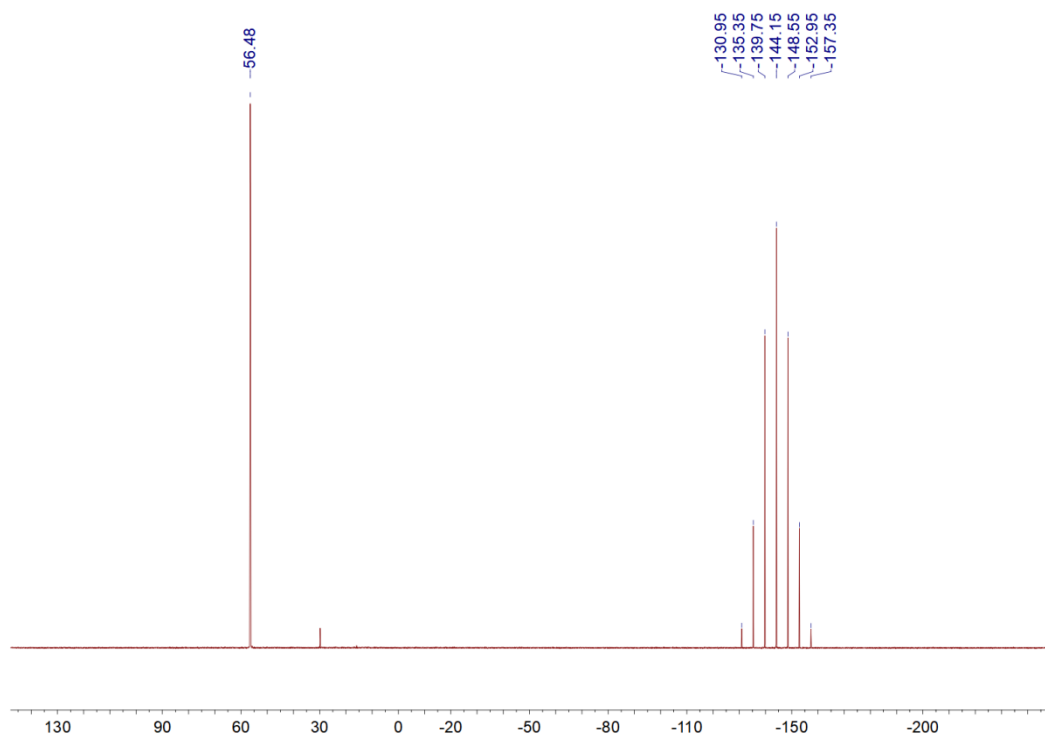



# Complex 7

<sup>1</sup>H-NMR

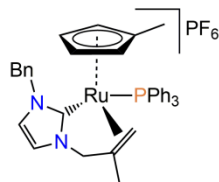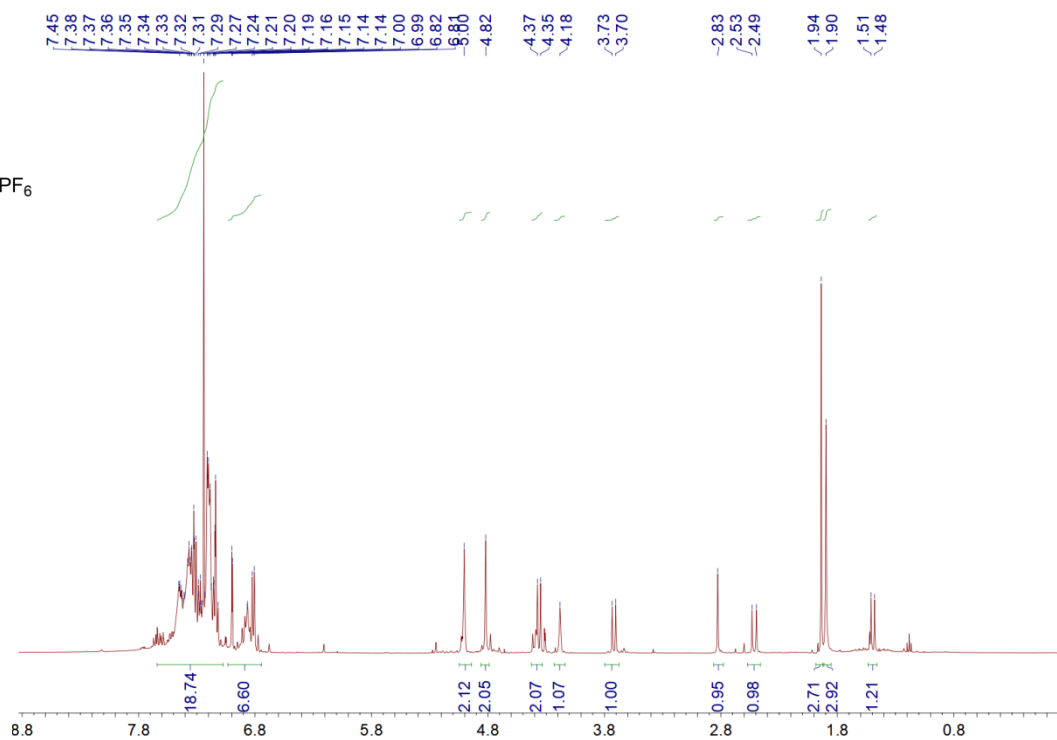

<sup>13</sup>C-NMR

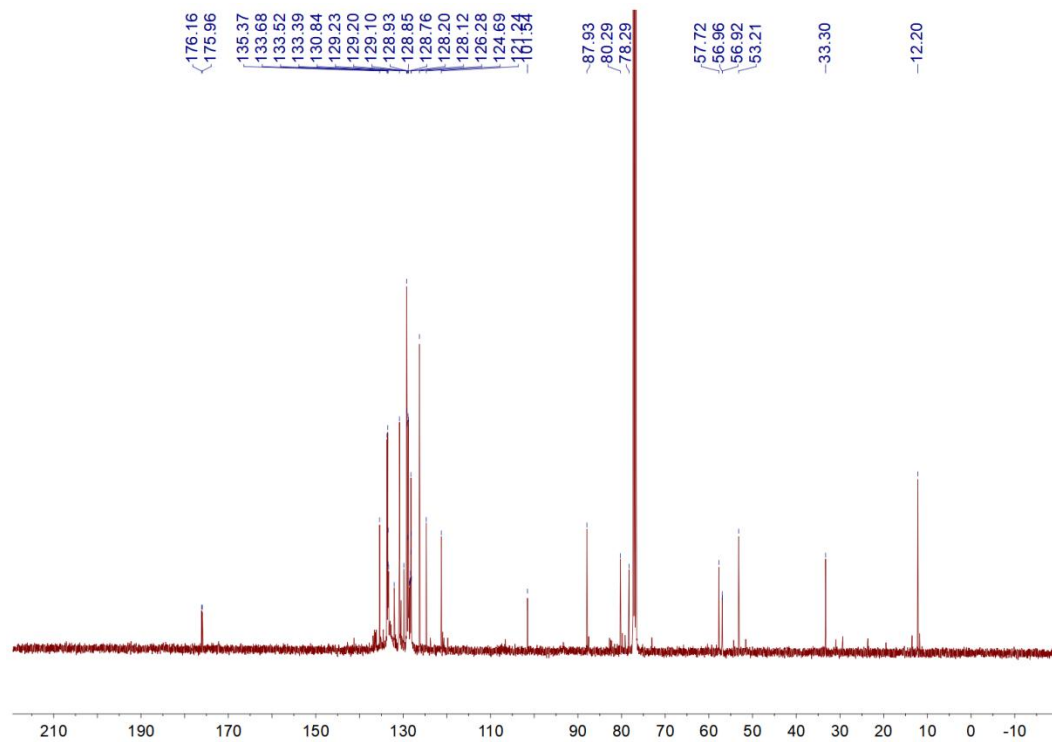

### $^{31}\text{P}$ -NMR

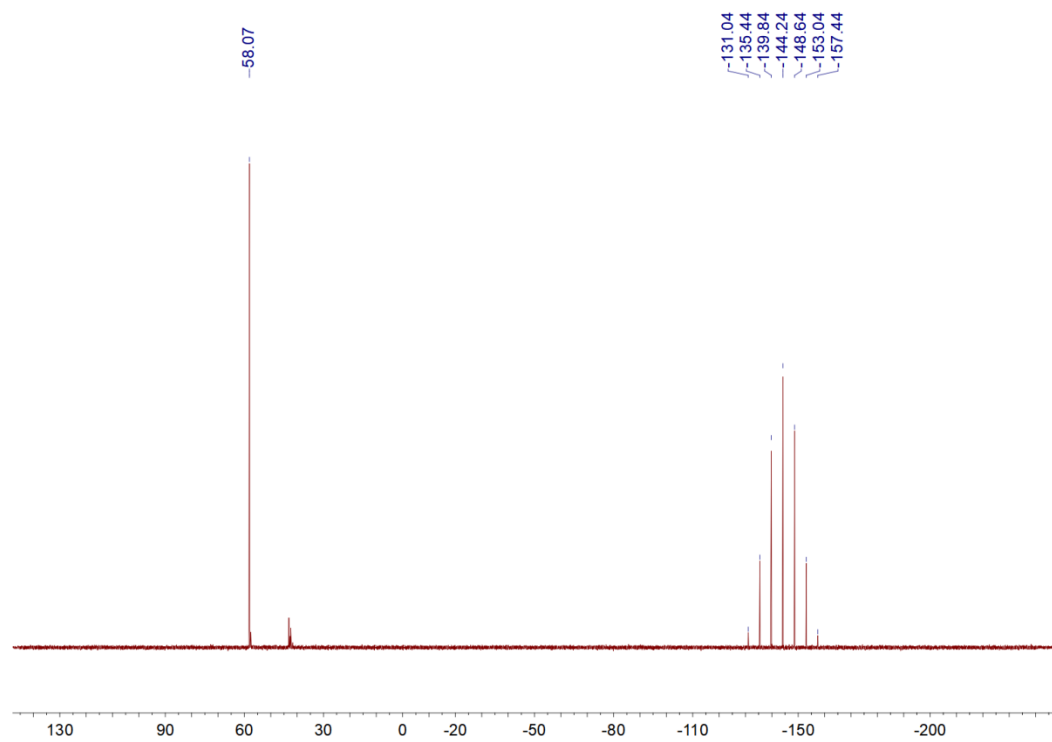

### Complex 8

#### $^1\text{H}$ -NMR

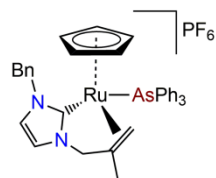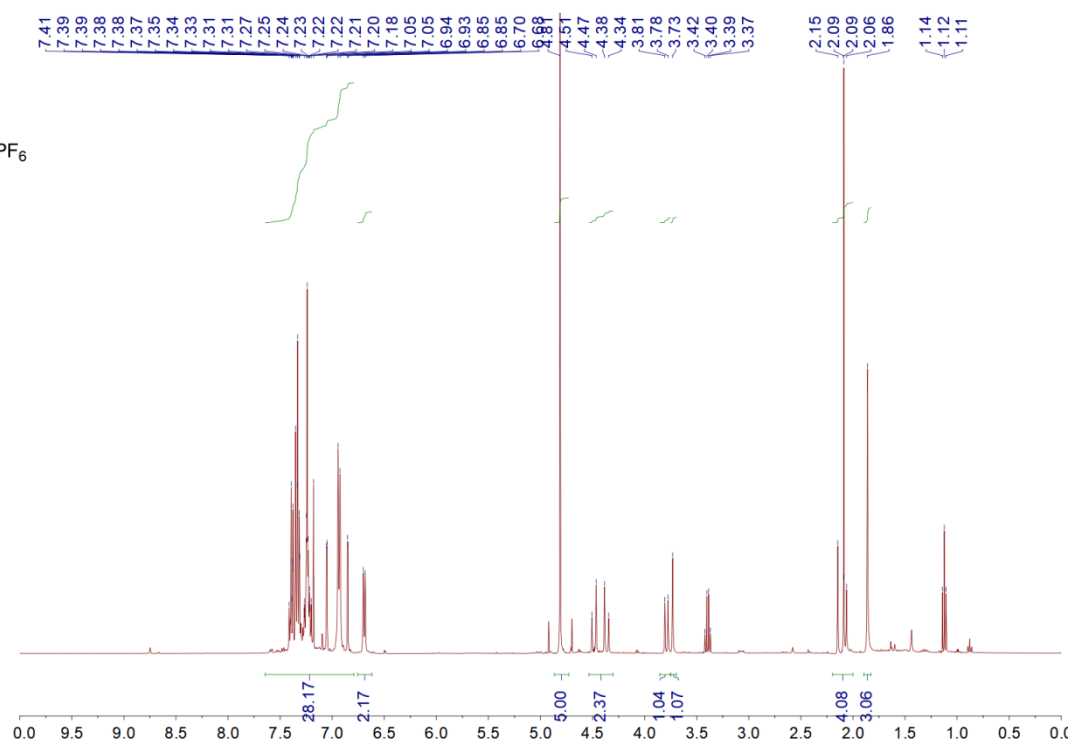

<sup>13</sup>C-NMR

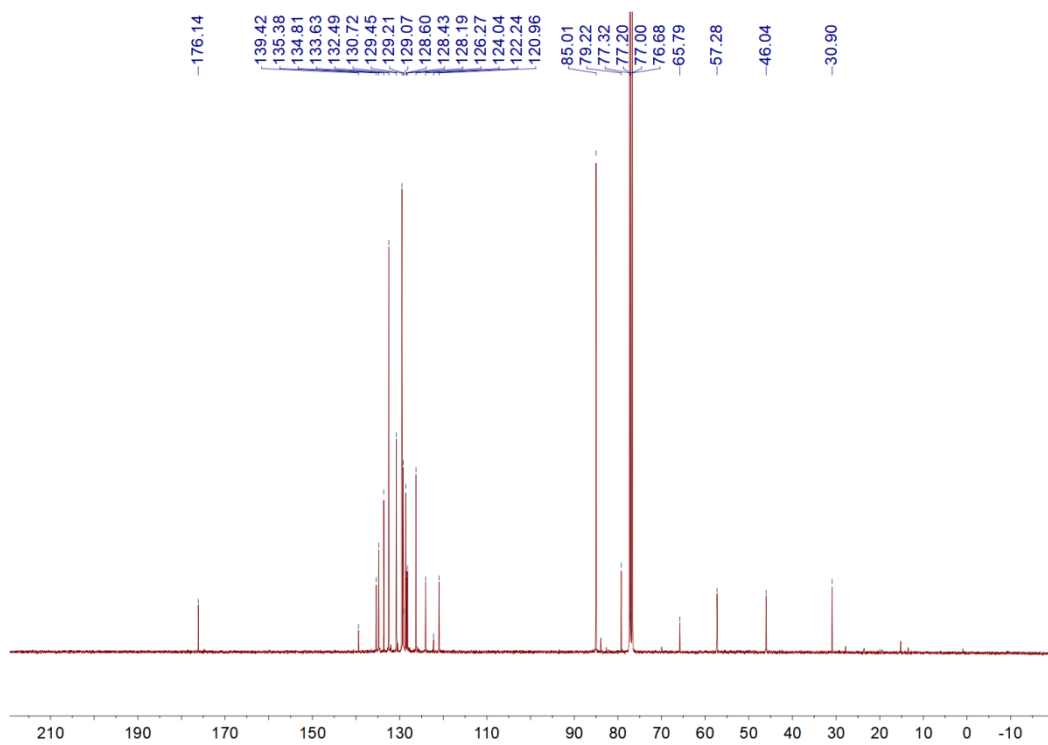

<sup>31</sup>P-NMR

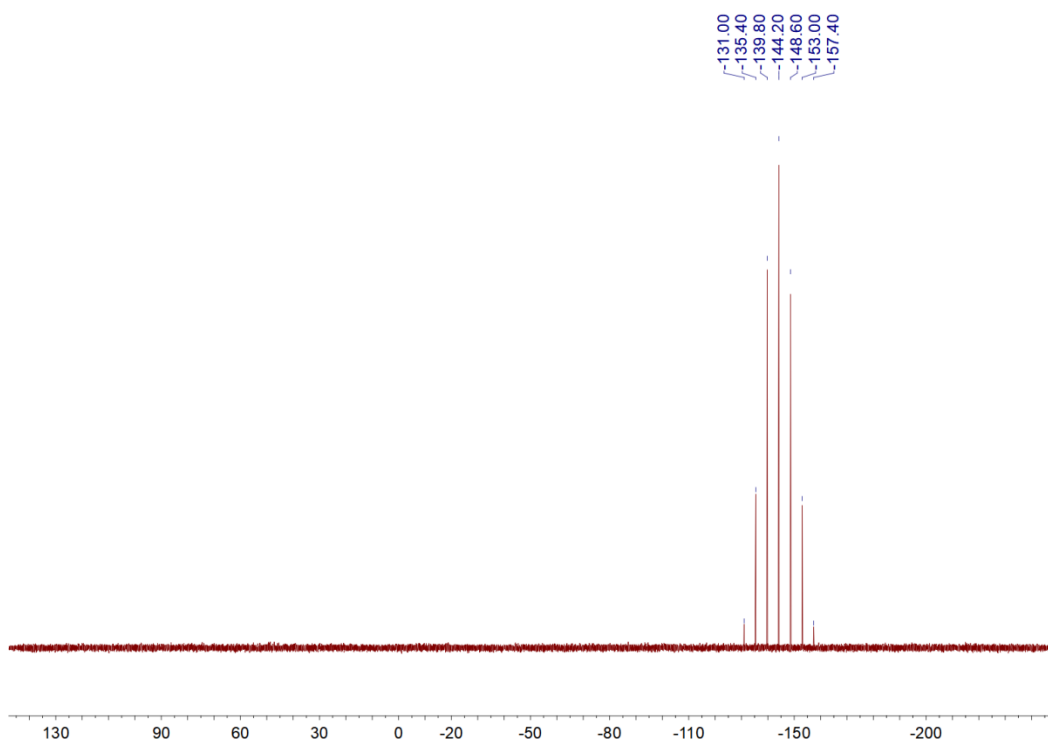

# Complex 9

## <sup>1</sup>H-NMR

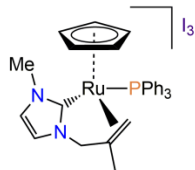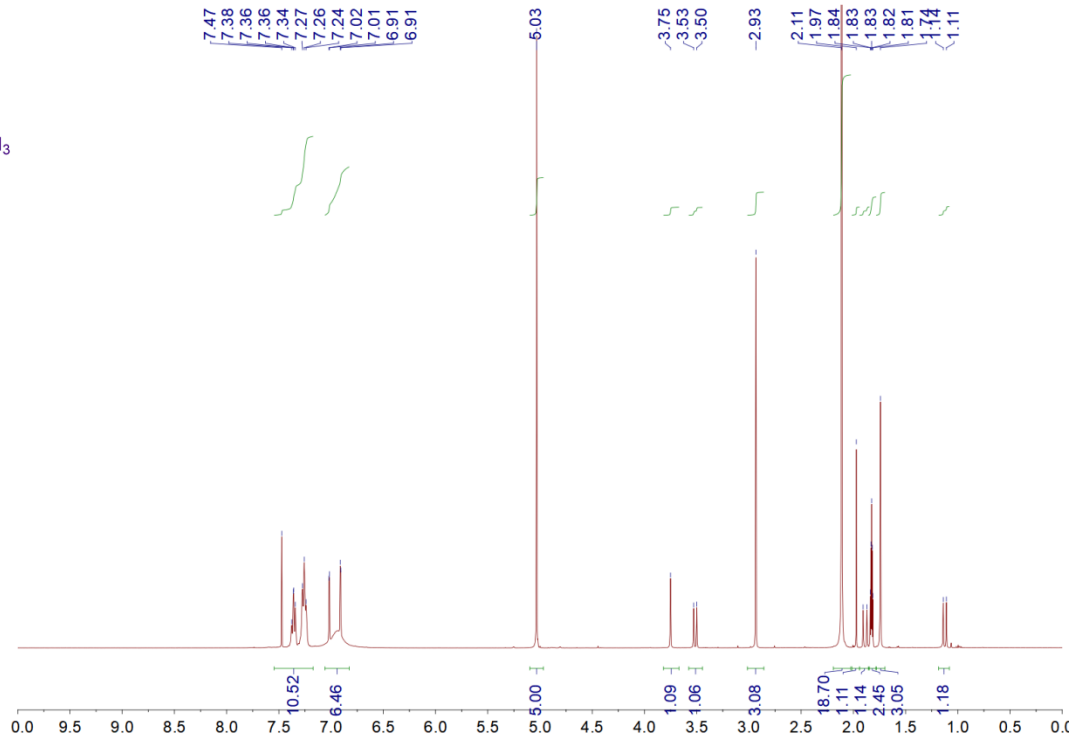

## <sup>13</sup>C-NMR

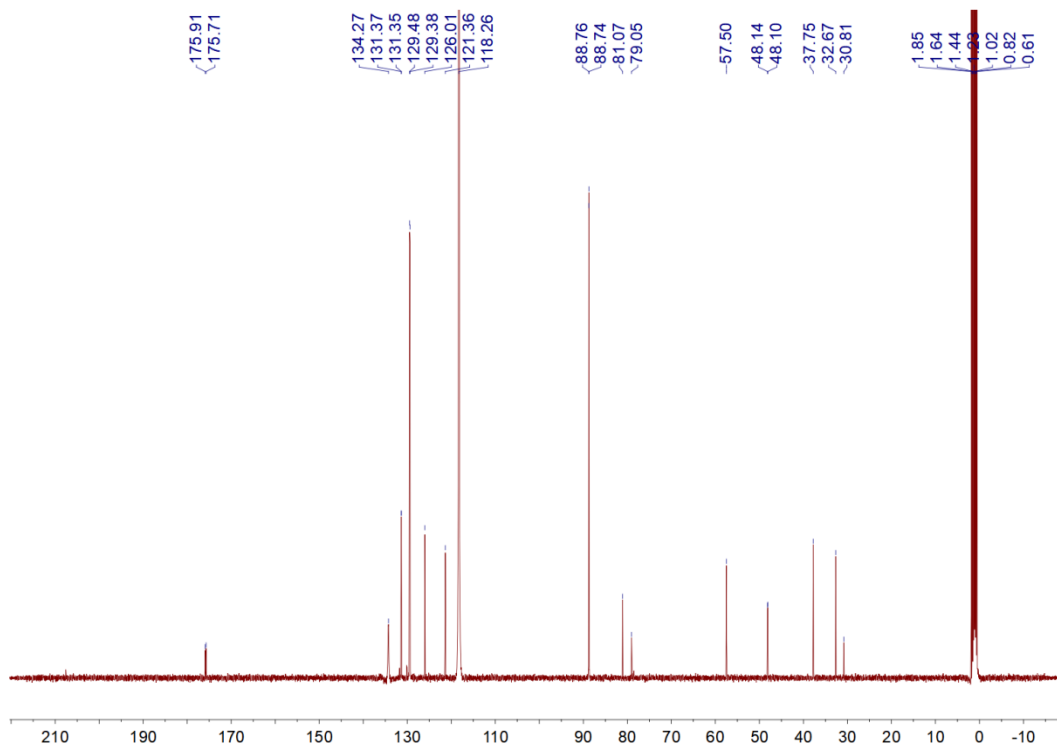

$^{31}\text{P}$ -NMR

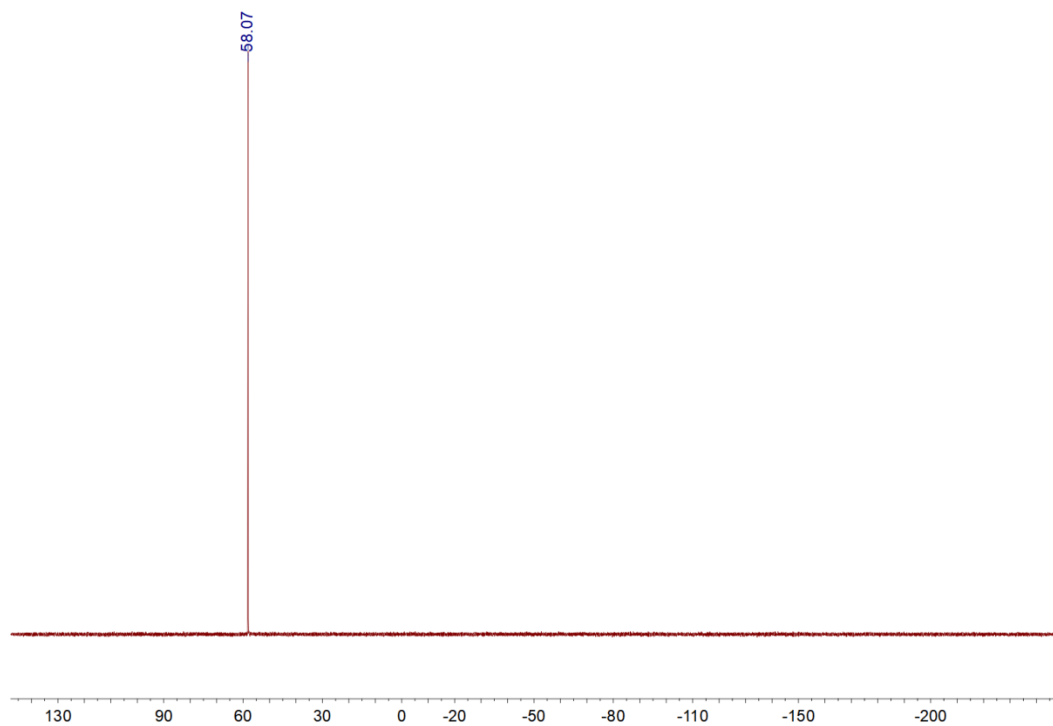

3. Variable temperature  $^1\text{H}$ -NMR (400 MHz) spectra (complex 4). [Solvent =  $(\text{CD}_3)_2\text{CO}$ .]

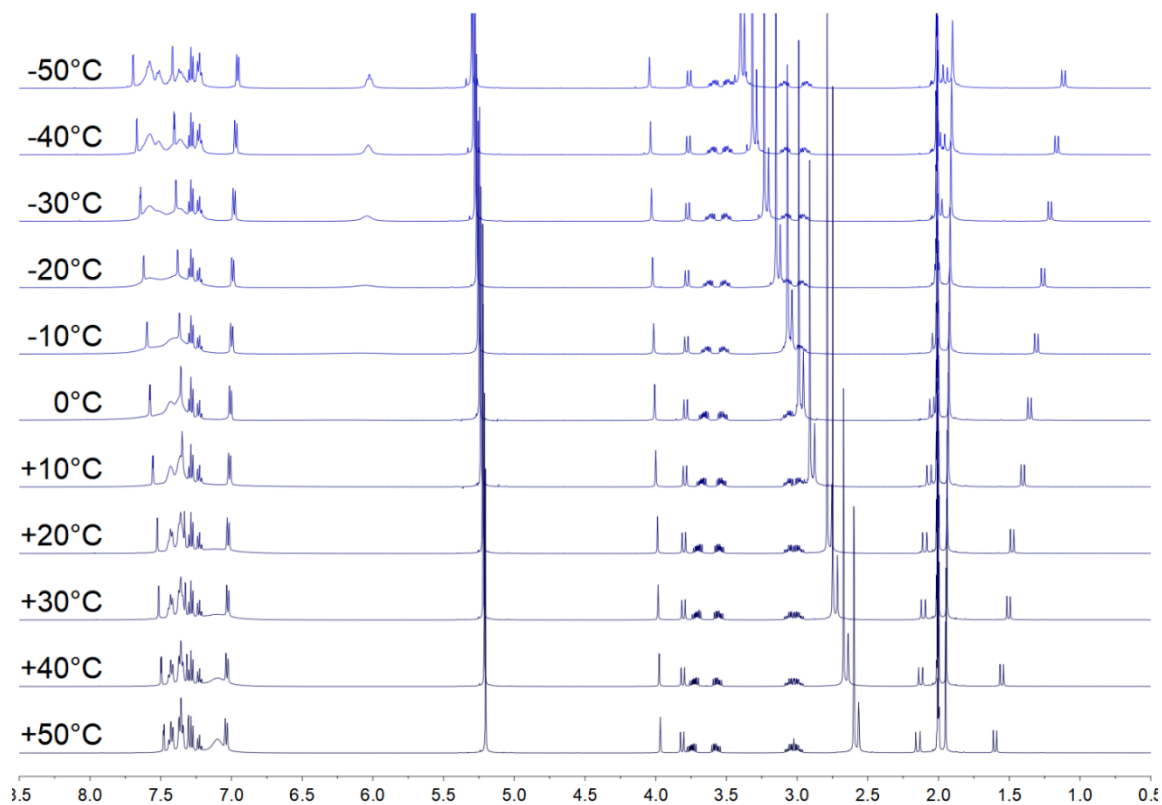

## 4. Crystal data and structure refinement for [HL5]Cl, P2,P3,1,2,4,5,8 (Tables S1,S2, S3)

Table S1

| Complex                                          | [HL5]Cl                                                                               | P2                                                                | P3                                                                 | 1                                                                               |
|--------------------------------------------------|---------------------------------------------------------------------------------------|-------------------------------------------------------------------|--------------------------------------------------------------------|---------------------------------------------------------------------------------|
| Emp. formula                                     | C <sub>14.7</sub> H <sub>24</sub> N <sub>2.7</sub> O <sub>0.7</sub> Cl <sub>1.3</sub> | C <sub>43</sub> H <sub>39</sub> Cl <sub>3</sub> P <sub>2</sub> Ru | C <sub>42</sub> H <sub>37</sub> Cl <sub>3</sub> As <sub>2</sub> Ru | C <sub>31</sub> H <sub>32</sub> N <sub>2</sub> F <sub>6</sub> P <sub>2</sub> Ru |
| Form. wt. (g.mol <sup>-1</sup> )                 | 295.64                                                                                | 740.17                                                            | 898.97                                                             | 709.59                                                                          |
| Crystal system                                   | orthorhombic                                                                          | triclinic                                                         | triclinic                                                          | monoclinic                                                                      |
| Space group                                      | <i>Pbcn</i>                                                                           | <i>P-1</i>                                                        | <i>P-1</i>                                                         | <i>P2<sub>1</sub>/c</i>                                                         |
| Crystal descr.                                   | colourless blade                                                                      | yellow block                                                      | orange block                                                       | yellow plate                                                                    |
| a (Å)                                            | 16.1278(8)                                                                            | 9.8196(2)                                                         | 9.931(7)                                                           | 16.2788(2)                                                                      |
| b (Å)                                            | 12.2682(5)                                                                            | 14.155(3)                                                         | 14.018(1)                                                          | 9.1026(9)                                                                       |
| c (Å)                                            | 12.5817(6)                                                                            | 14.978(3)                                                         | 14.536(1)                                                          | 19.875(2)                                                                       |
| α (°)                                            | 90                                                                                    | 73.264(8)                                                         | 102.99(2)                                                          | 90                                                                              |
| β (°)                                            | 90                                                                                    | 71.924(7)                                                         | 104.958(2)                                                         | 96.086(3)                                                                       |
| γ (°)                                            | 90                                                                                    | 78.353(7)                                                         | 98.90(2)                                                           | 90                                                                              |
| Volume (Å <sup>3</sup> )                         | 2489.4(2)                                                                             | 1880.8(6)                                                         | 1856.0(2)                                                          | 2928.5(5)                                                                       |
| Z                                                | 6                                                                                     | 2                                                                 | 2                                                                  | 4                                                                               |
| Abs. coeff. (m.mm <sup>-1</sup> )                | 0.280                                                                                 | 0.600                                                             | 2.438                                                              | 0.708                                                                           |
| F(000)                                           | 953.5                                                                                 | 760.0                                                             | 900.0                                                              | 1440.0                                                                          |
| Independent refl.                                | 2565                                                                                  | 7775                                                              | 9240                                                               | 6046                                                                            |
| Completeness (%)                                 | 99.9                                                                                  | 99.2                                                              | 99.6                                                               | 99.6                                                                            |
| Data/Restr/Para                                  | 2565/0/138                                                                            | 7775/0/443                                                        | 9240/0/433                                                         | 6046/0/381                                                                      |
| Goodness of fit on F <sup>2</sup>                | 1.034                                                                                 | 0.963                                                             | 1.037                                                              | 1.045                                                                           |
| Final R <sub>1</sub> indexes                     | 0.0376                                                                                | 0.0318                                                            | 0.0264                                                             | 0.0307                                                                          |
| wR <sub>2</sub> indices (all data)               | 0.1331                                                                                | 0.1153                                                            | 0.0524                                                             | 0.0666                                                                          |
| Largest diff. peak and hole (e.Å <sup>-3</sup> ) | 0.31/-0.32                                                                            | 1.25/-0.97                                                        | 0.47/-0.63                                                         | 1.83/-1.02                                                                      |

Table S2

| Complex                                          | 2                                                                                               | 4                                                                               | 5                                                                               | 8                                                                                                                  |
|--------------------------------------------------|-------------------------------------------------------------------------------------------------|---------------------------------------------------------------------------------|---------------------------------------------------------------------------------|--------------------------------------------------------------------------------------------------------------------|
| Emp. formula                                     | C <sub>38</sub> H <sub>38</sub> N <sub>2</sub> F <sub>6</sub> P <sub>2</sub> Cl <sub>2</sub> Ru | C <sub>38</sub> H <sub>38</sub> N <sub>2</sub> F <sub>6</sub> P <sub>2</sub> Ru | C <sub>34</sub> H <sub>36</sub> N <sub>2</sub> F <sub>6</sub> P <sub>2</sub> Ru | C <sub>150</sub> H <sub>148</sub> N <sub>8</sub> F <sub>24</sub> P <sub>4</sub> As <sub>4</sub> Cl <sub>4</sub> Ru |
| Form. wt. g.mol <sup>-1</sup> )                  | 870.61                                                                                          | 799.71                                                                          | 749.66                                                                          | 3488.51                                                                                                            |
| Crystal system                                   | monoclinic                                                                                      | triclinic                                                                       | monoclinic                                                                      | monoclinic                                                                                                         |
| Space group                                      | <i>P2<sub>1</sub>/n</i>                                                                         | <i>P-1</i>                                                                      | <i>C2/c</i>                                                                     | <i>P2<sub>1</sub></i>                                                                                              |
| Crystal descr.                                   | yellow block                                                                                    | yellow needle                                                                   | yellow block                                                                    | yellow block                                                                                                       |
| a (Å)                                            | 13.8600(6)                                                                                      | 11.0881(7)                                                                      | 18.0319(9)                                                                      | 9.910(2)                                                                                                           |
| b (Å)                                            | 13.9831(7)                                                                                      | 13.1574(8)                                                                      | 13.2824(6)                                                                      | 24.910(5)                                                                                                          |
| c (Å)                                            | 18.9389(9)                                                                                      | 14.6115(8)                                                                      | 29.0663(1)                                                                      | 15.236(3)                                                                                                          |
| α (°)                                            | 90                                                                                              | 113.867(2)                                                                      | 90                                                                              | 90                                                                                                                 |
| β (°)                                            | 93.545(2)                                                                                       | 95.538(2)                                                                       | 99.842(2)                                                                       | 108.51(3)                                                                                                          |
| γ (°)                                            | 90                                                                                              | 111.568(2)                                                                      | 90                                                                              | 90                                                                                                                 |
| Volume (Å <sup>3</sup> )                         | 3663.4(3)                                                                                       | 1735.89(2)                                                                      | 6859.1(6)                                                                       | 3566.6(1)                                                                                                          |
| Z                                                | 4                                                                                               | 2                                                                               | 8                                                                               | 1                                                                                                                  |
| Abs. coeff. (m.mm <sup>-1</sup> )                | 0.723                                                                                           | 0.607                                                                           | 0.609                                                                           | 1.542                                                                                                              |
| F(000)                                           | 1768.0                                                                                          | 816.0                                                                           | 3056.0                                                                          | 1753.0                                                                                                             |
| Independent refl.                                | 7590                                                                                            | 7167                                                                            | 7046                                                                            | 14652                                                                                                              |
| Completeness (%)                                 | 99.7                                                                                            | 99.9                                                                            | 99.8                                                                            | 99.7                                                                                                               |
| Data/Restr/Para                                  | 7590/0/461                                                                                      | 7167/0/443                                                                      | 7046/0/408                                                                      | 14652/1/905                                                                                                        |
| Goodness of fit on F <sup>2</sup>                | 1.535                                                                                           | 1.096                                                                           | 1.132                                                                           | 0.843                                                                                                              |
| Final R <sub>1</sub> indexes                     | 0.0532                                                                                          | 0.0367                                                                          | 0.0351                                                                          | 0.0289                                                                                                             |
| wR <sub>2</sub> indices (all data)               | 0.1895                                                                                          | 0.1288                                                                          | 0.0842                                                                          | 0.0637                                                                                                             |
| Largest diff. peak and hole (e.Å <sup>-3</sup> ) | 1.98/-1.82                                                                                      | 1.08/-0.87                                                                      | 0.73/-0.80                                                                      | 0.63/-0.54                                                                                                         |

**Table S3**

| Complex                                          | 9                                                                        |
|--------------------------------------------------|--------------------------------------------------------------------------|
| Emp. formula                                     | C <sub>15.5</sub> H <sub>16</sub> NP <sub>0.5</sub> 1.5Ru <sub>0.5</sub> |
| Form. weight (g.mol <sup>-1</sup> )              | 472.66                                                                   |
| Crystal system                                   | triclinic                                                                |
| Space group                                      | <i>P</i> -1                                                              |
| Crystal descr.                                   | yellow block                                                             |
| a (Å)                                            | 9.4358(2)                                                                |
| b (Å)                                            | 9.7889(2)                                                                |
| c (Å)                                            | 18.948(4)                                                                |
| α (°)                                            | 91.365(6)                                                                |
| β (°)                                            | 94.352(6)                                                                |
| γ (°)                                            | 114.451(5)                                                               |
| Volume (Å <sup>3</sup> )                         | 1585.6(5)                                                                |
| Z                                                | 4                                                                        |
| Abs. coeff. (m.mm <sup>-1</sup> )                | 3.488                                                                    |
| F(000)                                           | 900.0                                                                    |
| Independent refl.                                | 6706                                                                     |
| Completeness (%)                                 | 98.4                                                                     |
| Data/Restr/Para                                  | 6706/0/348                                                               |
| Goodness of fit on F <sup>2</sup>                | 1.047                                                                    |
| Final R <sub>1</sub> indexes                     | 0.0218                                                                   |
| wR <sub>2</sub> indices (all data)               | 0.0467                                                                   |
| Largest diff. peak and hole (e.Å <sup>-3</sup> ) | 1.31/-1.27                                                               |

5. **Table S4:** Selected bond lengths and angles for [HL5]Cl, P2,P3,1,2,4,5,8,9

| Description              | [HL5]Cl   | P2        | P3        | 1         | 2         | 4         | 5         | 8         | 9         |
|--------------------------|-----------|-----------|-----------|-----------|-----------|-----------|-----------|-----------|-----------|
| Ru1-C2                   | -         | -         | -         | 2.033(2)  | 2.042(4)  | 2.040(3)  | 2.038(3)  | 2.035(4)  | 2.033(3)  |
| Ru1-Cg <sup>a</sup>      | -         | 1.844(3)  | 1.813(4)  | 1.899(3)  | 1.894(3)  | 1.892(4)  | 1.889(6)  | 1.874(6)  | 1.907(7)  |
| Ru-E1 <sup>b</sup>       | -         | 2.3222(7) | 2.4229(2) | 2.3262(6) | 2.2993(1) | 2.3135(7) | 2.3168(6) | 2.4190(7) | 2.3155(8) |
| Ru1-C2-N1                | -         | -         | -         | 120.23(2) | 119.90(3) | 119.95(2) | 119.60(2) | 119.7(3)  | 120.81(2) |
| C2-Ru1-E1 <sup>b</sup>   | -         | -         | -         | 87.32(7)  | 88.98(1)  | 86.84(7)  | 87.19(7)  | 85.92(1)  | 87.51(7)  |
| E1-Ru1-Ca <sup>b,c</sup> | -         | -         | -         | 93.99(7)  | 95.33(1)  | 95.34(7)  | 96.08(8)  | 94.50(9)  | 93.14(7)  |
| C2-Ru1-Ca <sup>c</sup>   | -         | -         | -         | 89.65(1)  | 89.58(1)  | 89.71(1)  | 89.66(1)  | 89.38(2)  | 89.38(1)  |
| C2-N1-C4                 | 125.22(1) |           |           | 130.7(2)  | 118.0(3)  | 129.6(2)  | 118.4(2)  | 118.8(3)  | 117.6(2)  |
| C2-N2-C8                 | 126.14(2) | -         | -         | 126.30(2) | 127.00(3) | 125.8(2)  | 126.4(2)  | 125.5(3)  | 126.1(2)  |
| C2-N1-C4-C5              | 104.65(2) | -         | -         | 28.3(3)   | 26.6(5)   | 24.7(3)   | 27.5(3)   | -22.6(7)  | -26.8(3)  |
| C2-N2-C8-C9              | -68.92(2) | -         | -         | -         | -91.4(5)  | -104.4(3) | -99.9(3)  | 100.9(7)  | -         |

<sup>a</sup> Cg = centroid of arene/cyclopentadienyl moiety. <sup>b</sup> E = P (1-7), As (8). <sup>c</sup> Average position between two carbon atoms belonging to the alkene moiety.

## 6. Time-resolved conversion profiles in the transfer hydrogenation-epoxidation catalysis

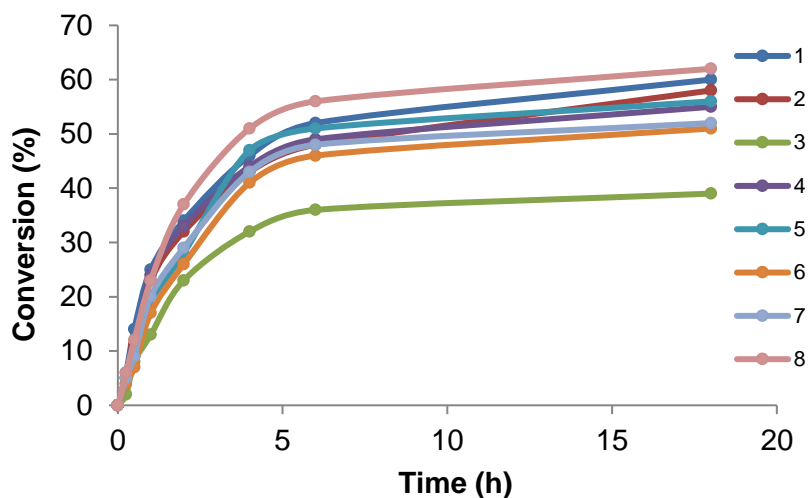

General conditions: 4'-bromophenylphenacylbromide (BPAB, 0.6 mmol), iPrOH (4 mL), KO<sup>t</sup>Bu (1.2 eq.), [Ru] (2 mol%), 110 °C. Determined by <sup>1</sup>H-NMR, based on the average of at least two runs.

## 7. Optimization of transfer hydrogenation-epoxidation conditions (Table S5)

**Table S5:** Optimization of transfer hydrogenation-epoxidation conditions.

| Entry | Complex              | Temp (°C) | Base               | Conversion <sup>a</sup> (%) |    |     | Selectivity <sup>b</sup> (%) |
|-------|----------------------|-----------|--------------------|-----------------------------|----|-----|------------------------------|
|       |                      |           |                    | 2h                          | 6h | 18h |                              |
| 1     | -                    | 110       | -                  | 0                           | 1  | 2   | 0:0:100                      |
| 2     | -                    | 110       | KO <sup>t</sup> Bu | 0                           | 2  | 3   | 0:0:100                      |
| 3     | <b>1</b>             | 110       | KOH                | 19                          | 31 | 38  | 49:51:0                      |
| 4     | <b>1<sup>c</sup></b> | 110       | KOH                | 20                          | 36 | 41  | 90:3:7                       |
| 5     | <b>1</b> (3 mol%)    | 110       | KO <sup>t</sup> Bu | 37                          | 55 | 63  | 29:71:0                      |
| 6     | <b>1</b> (1 mol%)    | 110       | KO <sup>t</sup> Bu | 21                          | 37 | 43  | 47:53:0                      |
| 7     | <b>1</b>             | 110       | KOH                | 26                          | 44 | 49  | 43:57:0                      |
| 8     | <b>1</b>             | 25        | KOH                | 7                           | 8  | 9   | 89:11:0                      |

General conditions: 4'-bromophenylphenacylbromide (BPAB, 0.6 mmol), iPrOH (4 mL), base (1.2 eq.), [Ru] (2 mol%), 110 °C. <sup>a</sup> Determined by <sup>1</sup>H-NMR, based on the average of at least two runs. <sup>b</sup> Selectivity (A:E:O) = alcohol:epoxide:other, after 18 hours. <sup>c</sup> Two equivalents of base used.



8.  $^1\text{H-NMR}$  spectrum of catalysis reaction mixture

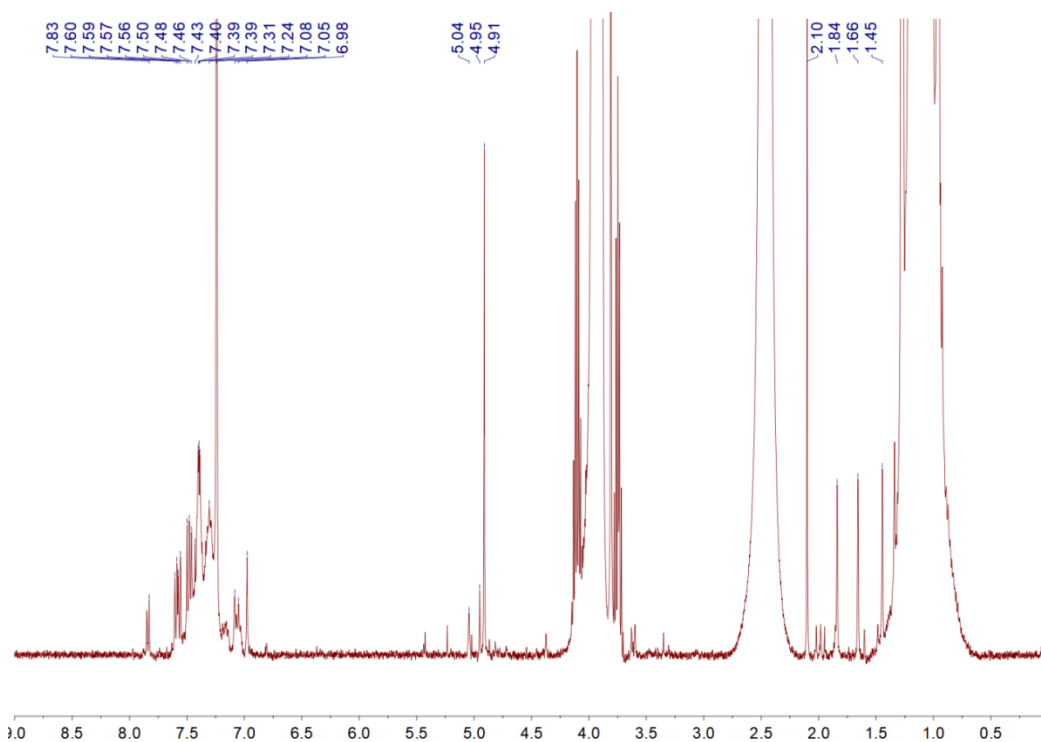

General conditions: 4'-bromophenylphenacylbromide (BPAB, 0.6 mmol),  $i\text{PrOH}$  (4 mL),  $\text{KO}^t\text{Bu}$  (1.2 eq.), [1] (2 mol%), anisole (0.6 mmol), 110  $^\circ\text{C}$ . Aliquot taken after 6 hours reaction time analysed using  $\text{CDCl}_3$ .
